# Supplementary material
Source: publisher figshare collection journal article supplement (https://gsajournals.figshare.com/ndownloader/files/22616549)
Supplement: Supplementary file 1 [file 22616549]

## Sheet: Sheet1
Tube.label	Location	Species	F1.Box	F1.Slot	Date extracted	F1 ID	Sex	PCR plate colum	PCR plate row	Infected	Notes
18CAR06-08	18CAR06	santomea	7	1	20190429	1	F	1	A	U
18CAR06-08	18CAR06	santomea	7	1	20190429	2	F	1	B	U
18CAR06-08	18CAR06	santomea	7	1	20190429	3	M	1	C	U
18CAR06-08	18CAR06	santomea	7	1	20190429	4	M	1	D	U
18CAR10-02	18CAR10	santomea	7	2	20190429	1	F	1	E	I
18CAR10-02	18CAR10	santomea	7	2	20190429	2	F	1	F	I
18CAR10-02	18CAR10	santomea	7	2	20190429	3	F	1	G	I
18CAR10-02	18CAR10	santomea	7	2	20190429	4	F	1	H	I
18CAR10-02	18CAR10	santomea	7	2	20190429	5	F	2	A	I
18CAR10-02	18CAR10	santomea	7	2	20190429	6	F	2	B	I
18CAR10-02	18CAR10	santomea	7	2	20190429	7	F	2	C	I
18CAR10-02	18CAR10	santomea	7	2	20190429	8	F	2	D	I
18CAR10-02	18CAR10	santomea	7	2	20190429	9	F	2	E	I
18CAR10-02	18CAR10	santomea	7	2	20190429	10	F	2	F	I
18CAR10-02	18CAR10	santomea	7	2	20190429	11	F	2	G	I
18CAR10-02	18CAR10	santomea	7	2	20190429	12	F	2	H	I
18CAR10-02	18CAR10	santomea	7	2	20190429	13	F	3	A	I
18CAR10-02	18CAR10	santomea	7	2	20190429	14	F	3	B	I
18CAR10-02	18CAR10	santomea	7	2	20190429	15	F	3	C	I
18CAR10-02	18CAR10	santomea	7	2	20190429	16	M	3	D	I
18CAR10-02	18CAR10	santomea	7	2	20190429	17	M	3	E	I
18CAR10-02	18CAR10	santomea	7	2	20190429	18	M	3	F	I
18CAR10-02	18CAR10	santomea	7	2	20190429	19	M	3	G	I
18CAR10-02	18CAR10	santomea	7	2	20190429	20	M	3	H	I
18CAR10-02	18CAR10	santomea	7	2	20190429	21	M	4	A	I
18TRNE01-09	18TRNE01	santomea	7	3	20190429	1	F	4	B	U
18TRNE01-09	18TRNE01	santomea	7	3	20190429	2	F	4	C	U
18TRNE01-09	18TRNE01	santomea	7	3	20190429	3	F	4	D	U
18TRNE01-09	18TRNE01	santomea	7	3	20190429	4	F	4	E	U
18TRNE01-09	18TRNE01	santomea	7	3	20190429	5	F	4	F	U
18TRNE01-09	18TRNE01	santomea	7	3	20190429	6	F	4	G	U
18TRNE01-09	18TRNE01	santomea	7	3	20190429	7	F	4	H	U
18TRNE01-09	18TRNE01	santomea	7	3	20190429	8	F	5	A	U
18TRNE01-09	18TRNE01	santomea	7	3	20190429	9	M	5	B	U
18TRNE07-18	18TRNE07	santomea	7	4	20190429	1	F	5	C	I
18TRNE07-18	18TRNE07	santomea	7	4	20190429	2	F	5	D	I
18TRNE07-18	18TRNE07	santomea	7	4	20190429	3	F	5	E	I
18TRNE07-18	18TRNE07	santomea	7	4	20190429	4	F	5	F	I
18TRNE07-18	18TRNE07	santomea	7	4	20190429	5	F	5	G	I
18TRNE07-18	18TRNE07	santomea	7	4	20190429	6	F	5	H	I
18TRNE07-18	18TRNE07	santomea	7	4	20190429	7	F	6	A	I
18TRNE07-18	18TRNE07	santomea	7	4	20190429	8	F	6	B	I
18TRNE07-18	18TRNE07	santomea	7	4	20190429	9	F	6	C	I
18TRNE07-18	18TRNE07	santomea	7	4	20190429	10	M	6	D	I
18TRNE07-18	18TRNE07	santomea	7	4	20190429	11	M	6	E	I
18TRNE07-18	18TRNE07	santomea	7	4	20190429	12	M	6	F	I
18TRNE07-18	18TRNE07	santomea	7	4	20190429	13	M	6	G	I
18TRNE07-18	18TRNE07	santomea	7	4	20190429	14	M	6	H	I
18CAR03	18CAR03	santomea	7	5	20190429	1	F	7	A	I
18CAR03	18CAR03	santomea	7	5	20190429	2	F	7	B	I
18CAR03	18CAR03	santomea	7	5	20190429	3	F	7	C	I
18CAR03	18CAR03	santomea	7	5	20190429	4	F	7	D	I
18CAR03	18CAR03	santomea	7	5	20190429	5	M	7	E	I
18CAR03	18CAR03	santomea	7	5	20190429	6	M	7	F	I
18CAR03	18CAR03	santomea	7	5	20190429	7	M	7	G	I
18CAR09-08	18CAR09	santomea	7	6	20190429	1	F	7	H	I
18CAR09-08	18CAR09	santomea	7	6	20190429	2	F	8	A	I
18CAR09-08	18CAR09	santomea	7	6	20190429	3	F	8	B	I
18CAR09-08	18CAR09	santomea	7	6	20190429	4	F	8	C	I
18CAR09-08	18CAR09	santomea	7	6	20190429	5	F	8	D	I
18CAR09-08	18CAR09	santomea	7	6	20190429	6	F	8	E	I
18CAR09-08	18CAR09	santomea	7	6	20190429	7	F	8	F	I
18CAR09-08	18CAR09	santomea	7	6	20190429	8	M	8	G	I
18CAR09-08	18CAR09	santomea	7	6	20190429	9	M	8	H	I
18CAR09-08	18CAR09	santomea	7	6	20190429	10	M	9	A	I
18CAR09-08	18CAR09	santomea	7	6	20190429	11	M	9	B	I
18CAR09-08	18CAR09	santomea	7	6	20190429	12	M	9	C	I
18CAR07-13	18CAR07	santomea	7	7	20190429	1	F	9	D	I
18CAR07-13	18CAR07	santomea	7	7	20190429	2	F	9	E	I
18CAR07-13	18CAR07	santomea	7	7	20190429	3	F	9	F	I
18CAR07-13	18CAR07	santomea	7	7	20190429	4	F	9	G	I
18CAR07-13	18CAR07	santomea	7	7	20190429	5	M	9	H	I
18CAR07-13	18CAR07	santomea	7	7	20190429	6	M	10	A	I
18CAR02-01	18CAR02	santomea	7	9	20190429	1	F	10	B	I
18CAR02-01	18CAR02	santomea	7	9	20190429	2	M	10	C	I
18CAR02-01	18CAR02	santomea	7	9	20190429	3	M	10	D	I
18CAR02-01	18CAR02	santomea	7	9	20190429	4	M	10	E	I
18CAR02-01	18CAR02	santomea	7	9	20190429	5	M	10	F	I
18CAR02-01	18CAR02	santomea	7	9	20190429	6	M	10	G	I
18CAR10-10	18CAR10	santomea	7	10	20190429	1	F	10	H	I
18CAR10-10	18CAR10	santomea	7	10	20190429	2	F	11	A	I
18CAR10-10	18CAR10	santomea	7	10	20190429	3	M	11	B	I
18CAR10-10	18CAR10	santomea	7	10	20190429	4	M	11	C	I
18CAR10-10	18CAR10	santomea	7	10	20190429	5	M	11	D	I
18CAR10-10	18CAR10	santomea	7	10	20190429	6	M	11	E	I
18CAR10-10	18CAR10	santomea	7	10	20190429	7	M	11	F	I
18CAR10-10	18CAR10	santomea	7	10	20190429	8	M	11	G	I
18CAR10-10	18CAR10	santomea	7	10	20190429	9	M	11	H	I
18CAR10-10	18CAR10	santomea	7	10	20190429	10	M	12	A	I
18CAR09-02	18CAR09	santomea	7	11	20190429	1	F	12	B	I
18CAR09-02	18CAR09	santomea	7	11	20190429	2	M	12	C	I
18CAR09-02	18CAR09	santomea	7	11	20190429	3	M	12	D	I
18CAR09-02	18CAR09	santomea	7	11	20190429	4	M	12	E	I
18CAR09-02	18CAR09	santomea	7	11	20190501	5	F	1	A	I
18CAR09-02	18CAR09	santomea	7	11	20190501	6	F	1	B	I
18CAR09-02	18CAR09	santomea	7	11	20190501	7	F	1	C	I
18CAR09-02	18CAR09	santomea	7	11	20190501	8	M	1	D	I
18CAR09-02	18CAR09	santomea	7	11	20190501	9	M	1	E	I
18CAR09-02	18CAR09	santomea	7	11	20190501	10	M	1	F	I	low titer, confirmed
18TRNE07-10	18TRNE07	santomea	7	13	20190501	1	F	1	G	I
18TRNE07-10	18TRNE07	santomea	7	13	20190501	2	F	1	H	I
18TRNE07-10	18TRNE07	santomea	7	13	20190501	3	F	2	A	I
18TRNE07-10	18TRNE07	santomea	7	13	20190501	4	F	2	B	I
18TRNE07-10	18TRNE07	santomea	7	13	20190501	5	F	2	C	I
18TRNE07-10	18TRNE07	santomea	7	13	20190501	6	F	2	D	I
18TRNE07-10	18TRNE07	santomea	7	13	20190501	7	F	2	E	I
18TRNE07-10	18TRNE07	santomea	7	13	20190501	8	F	2	F	I
18TRNE07-10	18TRNE07	santomea	7	13	20190501	9	F	2	G	I
18TRNE07-10	18TRNE07	santomea	7	13	20190501	10	M	2	H	I
18TRNE07-10	18TRNE07	santomea	7	13	20190501	11	M	3	A	I
18TRNE07-10	18TRNE07	santomea	7	13	20190501	12	M	3	B	I
18TRNE07-10	18TRNE07	santomea	7	13	20190501	13	M	3	C	I
18TRNE07-10	18TRNE07	santomea	7	13	20190501	14	M	3	D	I
18TRNE07-10	18TRNE07	santomea	7	13	20190501	15	M	3	E	I
18TRNE07-10	18TRNE07	santomea	7	13	20190501	16	M	3	F	I
18CAR10-12	18CAR10	santomea	7	14	20190501	1	F	3	G	I
18CAR10-12	18CAR10	santomea	7	14	20190501	2	F	3	H	I
18CAR10-12	18CAR10	santomea	7	14	20190501	3	F	4	A	I
18CAR10-12	18CAR10	santomea	7	14	20190501	4	F	4	B	I
18CAR10-12	18CAR10	santomea	7	14	20190501	5	F	4	C	I
18CAR10-12	18CAR10	santomea	7	14	20190501	6	M	4	D	I
18CAR10-12	18CAR10	santomea	7	14	20190501	7	M	4	E	I
18CAR10-12	18CAR10	santomea	7	14	20190501	8	M	4	F	I
18CAR07-05	18CAR07	santomea	7	15	20190501	1	F	4	G	U
18CAR07-05	18CAR07	santomea	7	15	20190501	2	M	4	H	U
18CAR02-07	18CAR02	santomea	7	16	20190501	1	F	5	A	I
18CAR02-07	18CAR02	santomea	7	16	20190501	2	F	5	B	I
18CAR02-07	18CAR02	santomea	7	16	20190501	3	F	5	C	I
18CAR02-07	18CAR02	santomea	7	16	20190501	4	M	5	D	I
18CAR02-07	18CAR02	santomea	7	16	20190501	5	M	5	E	I
18CAR02-07	18CAR02	santomea	7	16	20190501	6	M	5	F	I
18CAR02-07	18CAR02	santomea	7	16	20190501	7	M	5	G	I
18CAR05-04	18CAR05	santomea	7	17	20190501	1	F	5	H	I
18CAR05-04	18CAR05	santomea	7	17	20190501	2	F	6	A	I
18CAR05-04	18CAR05	santomea	7	17	20190501	3	F	6	B	I
18CAR05-04	18CAR05	santomea	7	17	20190501	4	F	6	C	I
18CAR05-04	18CAR05	santomea	7	17	20190501	5	M	6	D	I
18CAR06-200	18CAR06	santomea	7	18	20190501	1	M	6	E	U
18CAR06-200	18CAR06	santomea	7	18	20190501	2	M	6	F	U
18CAR07-02	18CAR07	santomea	7	19	20190501	1	F	6	G	I
18CAR07-02	18CAR07	santomea	7	19	20190501	2	F	6	H	I
18CAR07-02	18CAR07	santomea	7	19	20190501	3	F	7	A	I
18CAR07-02	18CAR07	santomea	7	19	20190501	4	F	7	B	I
18CAR07-02	18CAR07	santomea	7	19	20190501	5	F	7	C	I
18CAR07-02	18CAR07	santomea	7	19	20190501	6	F	7	D	I
18CAR07-02	18CAR07	santomea	7	19	20190501	7	M	7	E	I
18CAR07-02	18CAR07	santomea	7	19	20190501	8	M	7	F	I
18CAR07-02	18CAR07	santomea	7	19	20190501	9	M	7	G	I
18CAR07-02	18CAR07	santomea	7	19	20190501	10	M	7	H	I
18CAR10-09	18CAR10	santomea	7	20	20190501	1	F	8	A	I
18CAR10-09	18CAR10	santomea	7	20	20190501	2	F	8	B	I
18CAR10-09	18CAR10	santomea	7	20	20190501	3	F	8	C	I
18CAR10-09	18CAR10	santomea	7	20	20190501	4	F	8	D	I
18CAR10-09	18CAR10	santomea	7	20	20190501	5	M	8	E	I
18CAR10-09	18CAR10	santomea	7	20	20190501	6	M	8	F	I
18CAR10-09	18CAR10	santomea	7	20	20190501	7	M	8	G	I
18CAR10-09	18CAR10	santomea	7	20	20190501	8	M	8	H	I
18CAR10-09	18CAR10	santomea	7	20	20190501	9	M	9	A	I
18TRNE07-09	18TRNE07	santomea	7	22	20190501	1	F	9	B	I
18TRNE07-09	18TRNE07	santomea	7	22	20190501	2	F	9	C	I
18TRNE07-09	18TRNE07	santomea	7	22	20190501	3	F	9	D	I
18TRNE07-09	18TRNE07	santomea	7	22	20190501	4	F	9	E	I
18TRNE07-09	18TRNE07	santomea	7	22	20190501	5	F	9	F	I
18TRNE07-09	18TRNE07	santomea	7	22	20190501	6	F	9	G	I
18TRNE07-09	18TRNE07	santomea	7	22	20190501	7	F	9	H	I
18TRNE07-09	18TRNE07	santomea	7	22	20190501	8	M	10	A	I
18TRNE07-09	18TRNE07	santomea	7	22	20190501	9	M	10	B	I
18TRNE07-09	18TRNE07	santomea	7	22	20190501	10	M	10	C	I
18TRNE07-09	18TRNE07	santomea	7	22	20190501	11	M	10	D	I
18TRNE07-09	18TRNE07	santomea	7	22	20190501	12	M	10	E	I
18TRNE07-09	18TRNE07	santomea	7	22	20190501	13	M	10	F	I
18TRNE01-10	18TRNE01	santomea	7	23	20190501	1	F	10	G	I
18TRNE01-10	18TRNE01	santomea	7	23	20190501	2	F	10	H	I
18TRNE01-10	18TRNE01	santomea	7	23	20190501	3	F	11	A	I
18TRNE01-10	18TRNE01	santomea	7	23	20190501	4	F	11	B	I
18TRNE01-10	18TRNE01	santomea	7	23	20190501	5	F	11	C	I
18TRNE01-10	18TRNE01	santomea	7	23	20190501	6	F	11	D	I
18TRNE01-10	18TRNE01	santomea	7	23	20190501	7	F	11	E	I
18TRNE01-10	18TRNE01	santomea	7	23	20190501	8	M	11	F	I
18TRNE01-10	18TRNE01	santomea	7	23	20190501	9	M	11	G	I
18TRNE01-10	18TRNE01	santomea	7	23	20190501	10	M	11	H	I
18TRNE01-10	18TRNE01	santomea	7	23	20190501	11	M	12	A	I
18CAR10-06	18CAR10	santomea	7	24	20190501	1	M	12	B	I
18CAR10-06	18CAR10	santomea	7	24	20190501	2	M	12	C	I
18CAR10-06	18CAR10	santomea	7	24	20190501	3	M	12	D	I
18CAR06	18CAR06	santomea	7	27	20190501	1	M	12	E	U
18YAK05b-22	18YAK05b	yakuba	7	55	20190506	1	F	1	A	U
18YAK05b-22	18YAK05b	yakuba	7	55	20190506	2	F	1	B	U
18YAK05b-22	18YAK05b	yakuba	7	55	20190506	3	F	1	C	U
18YAK05b-22	18YAK05b	yakuba	7	55	20190506	4	F	1	D	U
18YAK05b-22	18YAK05b	yakuba	7	55	20190506	5	M	1	E	U
18YAK05b-22	18YAK05b	yakuba	7	55	20190506	6	M	1	F	U
18YAK04-83	18YAK04	yakuba	7	59	20190506	1	F	1	G	U
18YAK04-83	18YAK04	yakuba	7	59	20190506	2	F	1	H	U
18YAK04-83	18YAK04	yakuba	7	59	20190506	3	F	2	A	U
18YAK04-83	18YAK04	yakuba	7	59	20190506	4	F	2	B	U
18YAK04-83	18YAK04	yakuba	7	59	20190506	5	M	2	C	U
18YAK04-83	18YAK04	yakuba	7	59	20190506	6	M	2	D	I
18YAK04-83	18YAK04	yakuba	7	59	20190506	7	M	2	E	U
18YAK04-83	18YAK04	yakuba	7	59	20190506	8	M	2	F	U
18YAK05b-31	18YAK05b	yakuba	7	61	20190506	1	F	2	G	I
18YAK05b-31	18YAK05b	yakuba	7	61	20190506	2	F	2	H	I
18YAK05b-31	18YAK05b	yakuba	7	61	20190506	3	F	3	A	I
18YAK05b-31	18YAK05b	yakuba	7	61	20190506	4	F	3	B	I
18YAK05b-31	18YAK05b	yakuba	7	61	20190506	5	F	3	C	I
18YAK05b-31	18YAK05b	yakuba	7	61	20190506	6	M	3	D	I
18YAK05b-31	18YAK05b	yakuba	7	61	20190506	7	M	3	E	I
18YAK05b-31	18YAK05b	yakuba	7	61	20190506	8	M	3	F	I
18YAK05b-31	18YAK05b	yakuba	7	61	20190506	9	M	3	G	I
18YAK05	18YAK05	yakuba	7	78	20190506	1	F	3	H	I
18YAK05	18YAK05	yakuba	7	78	20190506	2	F	4	A	I
18YAK05	18YAK05	yakuba	7	78	20190506	3	F	4	B	I
18YAK05	18YAK05	yakuba	7	78	20190506	4	F	4	C	I
18YAK05	18YAK05	yakuba	7	78	20190506	5	F	4	D	I
18YAK05	18YAK05	yakuba	7	78	20190506	6	F	4	E	I
18YAK05	18YAK05	yakuba	7	78	20190506	7	F	4	F	I
18YAK05	18YAK05	yakuba	7	78	20190506	8	F	4	G	I
18YAK05	18YAK05	yakuba	7	78	20190506	9	M	4	H	I
18YAK05	18YAK05	yakuba	7	78	20190506	10	M	5	A	U
18YAK05	18YAK05	yakuba	7	78	20190506	11	M	5	B	I
18YAK05	18YAK05	yakuba	7	78	20190506	12	M	5	C	I
18YAK05	18YAK05	yakuba	7	78	20190506	13	F	5	D	I
18YAK05	18YAK05	yakuba	7	78	20190506	14	M	5	E	I
18YAK05	18YAK05	yakuba	7	78	20190506	15	M	5	F	I
18YAK03	18YAK03	yakuba	7	81	20190506	1	F	5	G	I
18YAK03	18YAK03	yakuba	7	81	20190506	2	F	5	H	I
18YAK03	18YAK03	yakuba	7	81	20190506	3	F	6	A	I
18YAK03	18YAK03	yakuba	7	81	20190506	4	F	6	B	I
18YAK03	18YAK03	yakuba	7	81	20190506	5	F	6	C	I
18YAK03	18YAK03	yakuba	7	81	20190506	6	F	6	D	I
18YAK03	18YAK03	yakuba	7	81	20190506	7	F	6	E	I
18YAK03	18YAK03	yakuba	7	81	20190506	8	F	6	F	I
18YAK03	18YAK03	yakuba	7	81	20190506	9	F	6	G	I
18YAK03	18YAK03	yakuba	7	81	20190506	10	F	6	H	I
18YAK03	18YAK03	yakuba	7	81	20190506	11	F	7	A	I
18YAK03	18YAK03	yakuba	7	81	20190506	12	M	7	B	I
18YAK03	18YAK03	yakuba	7	81	20190506	13	M	7	C	I
18YAK03	18YAK03	yakuba	7	81	20190506	14	M	7	D	I
18YAK03	18YAK03	yakuba	7	81	20190506	15	M	7	E	I
18YAK03	18YAK03	yakuba	7	81	20190506	16	M	7	F	I
18YAK03	18YAK03	yakuba	7	81	20190506	17	M	7	G	I
18YAK03	18YAK03	yakuba	7	81	20190506	18	M	7	H	I
18YAK03	18YAK03	yakuba	7	81	20190506	19	M	8	A	I
18YAK03	18YAK03	yakuba	7	81	20190506	20	M	8	B	I
18YAK03	18YAK03	yakuba	7	81	20190506	21	M	8	C	I
18YAK03	18YAK03	yakuba	7	81	20190506	22	M	8	D	I
18YAK03	18YAK03	yakuba	7	81	20190506	23	M	8	E	I
18YAK02	18YAK02	yakuba	8	17	20190506	1	F	8	F	U
18YAK02	18YAK02	yakuba	8	17	20190506	2	F	8	G	U
18YAK02	18YAK02	yakuba	8	17	20190506	3	F	8	H	U
18YAK02	18YAK02	yakuba	8	17	20190506	4	M	9	A	U
18YAK02	18YAK02	yakuba	8	17	20190506	5	M	9	B	U
18YAK05b-43	18YAK05b	yakuba	8	30	20190506	1	F	9	C	I
18YAK05b-43	18YAK05b	yakuba	8	30	20190506	2	M	9	D	I
18YAK05b-43	18YAK05b	yakuba	8	30	20190506	3	M	9	E	I
18YAK05b-48	18YAK05b	yakuba	8	43	20190506	1	F	9	F	U
18YAK05b-48	18YAK05b	yakuba	8	43	20190506	2	F	9	G	U
18YAK05b-48	18YAK05b	yakuba	8	43	20190506	3	F	9	H	I	low titer, confirmed
18YAK05b-48	18YAK05b	yakuba	8	43	20190506	4	F	10	A	U
18YAK05b-48	18YAK05b	yakuba	8	43	20190506	5	F	10	B	U
18YAK05b-48	18YAK05b	yakuba	8	43	20190506	6	F	10	C	U
18YAK05b-48	18YAK05b	yakuba	8	43	20190506	7	F	10	D	U
18YAK05b-48	18YAK05b	yakuba	8	43	20190506	8	F	10	E	I	low titer, confirmed
18YAK05b-48	18YAK05b	yakuba	8	43	20190506	9	M	10	F	U
18YAK05b-48	18YAK05b	yakuba	8	43	20190506	10	M	10	G	U
18YAK05b-48	18YAK05b	yakuba	8	43	20190506	11	M	10	H	U
18YAK05b-48	18YAK05b	yakuba	8	43	20190506	12	M	11	A	I	low titer, confirmed
18YAK05b-48	18YAK05b	yakuba	8	43	20190506	13	M	11	B	U
18YAK05b-50	18YAK05b	yakuba	8	46	20190506	1	F	11	C	I
18YAK05b-50	18YAK05b	yakuba	8	46	20190506	2	F	11	D	I
18YAK05b-50	18YAK05b	yakuba	8	46	20190506	3	F	11	E	I
18YAK05b-50	18YAK05b	yakuba	8	46	20190506	4	F	11	F	I
18YAK05b-50	18YAK05b	yakuba	8	46	20190506	5	M	11	G	I
18YAK05b-50	18YAK05b	yakuba	8	46	20190506	6	M	11	H	I
18YAK05b-50	18YAK05b	yakuba	8	46	20190506	7	M	12	A	I
18YAK04-09	18YAK04	yakuba	8	79	20190506	1	M	12	B	I
18YAK04-79	18YAK04	yakuba	9	2	20190506	1	F	12	C	I
18YAK04-79	18YAK04	yakuba	9	2	20190506	2	F	12	D	I
18YAK04-79	18YAK04	yakuba	9	2	20190506	3	M	12	E	I
18YAK04-72	18YAK04	yakuba	9	23	20190508	1	F	1	A	I
18YAK04-72	18YAK04	yakuba	9	23	20190508	2	F	1	B	I
18YAK04-72	18YAK04	yakuba	9	23	20190508	3	F	1	C	I
18YAK04-72	18YAK04	yakuba	9	23	20190508	4	F	1	D	I
18YAK04-72	18YAK04	yakuba	9	23	20190508	5	F	1	E	I
18YAK04-72	18YAK04	yakuba	9	23	20190508	6	F	1	F	I
18YAK04-72	18YAK04	yakuba	9	23	20190508	7	F	1	G	I
18YAK04-72	18YAK04	yakuba	9	23	20190508	8	M	1	H	I
18YAK04-72	18YAK04	yakuba	9	23	20190508	9	M	2	A	I
18YAK04-72	18YAK04	yakuba	9	23	20190508	10	M	2	B	I
18YAK04-72	18YAK04	yakuba	9	23	20190508	11	M	2	C	I
18YAK04-72	18YAK04	yakuba	9	23	20190508	12	M	2	D	I
18YAK04-72	18YAK04	yakuba	9	23	20190508	13	M	2	E	I
18YAK04-72	18YAK04	yakuba	9	23	20190508	14	M	2	F	I
18YAK04-72	18YAK04	yakuba	9	23	20190508	15	M	2	G	I
18YAK04-87	18YAK04	yakuba	9	24	20190508	1	F	2	H	I
18YAK04-87	18YAK04	yakuba	9	24	20190508	2	F	3	A	I
18YAK04-87	18YAK04	yakuba	9	24	20190508	3	F	3	B	I
18YAK04-87	18YAK04	yakuba	9	24	20190508	4	F	3	C	I
18YAK04-87	18YAK04	yakuba	9	24	20190508	5	F	3	D	I
18YAK04-87	18YAK04	yakuba	9	24	20190508	6	F	3	E	I
18YAK04-87	18YAK04	yakuba	9	24	20190508	7	F	3	F	I
18YAK04-87	18YAK04	yakuba	9	24	20190508	8	F	3	G	I
18YAK04-87	18YAK04	yakuba	9	24	20190508	9	F	3	H	I
18YAK04-87	18YAK04	yakuba	9	24	20190508	10	F	4	A	I
18YAK04-87	18YAK04	yakuba	9	24	20190508	11	F	4	B	I
18YAK04-87	18YAK04	yakuba	9	24	20190508	12	F	4	C	I
18YAK04-87	18YAK04	yakuba	9	24	20190508	13	M	4	D	I
18YAK04-87	18YAK04	yakuba	9	24	20190508	14	M	4	E	I
18YAK04-87	18YAK04	yakuba	9	24	20190508	15	M	4	F	I
18YAK04-87	18YAK04	yakuba	9	24	20190508	16	M	4	G	I
18YAK04-87	18YAK04	yakuba	9	24	20190508	17	M	4	H	I
18YAK04-80	18YAK04	yakuba	9	27	20190508	1	F	5	A	I
18YAK04-80	18YAK04	yakuba	9	27	20190508	2	F	5	B	I
18YAK04-80	18YAK04	yakuba	9	27	20190508	3	M	5	C	I
18YAK04-80	18YAK04	yakuba	9	27	20190508	4	M	5	D	I
18YAK04-80	18YAK04	yakuba	9	27	20190508	5	M	5	E	I
18YAK04-80	18YAK04	yakuba	9	27	20190508	6	M	5	F	I
18YAK04-81	18YAK04	yakuba	9	28	20190508	1	F	5	G	I	low titer, confirmed
18YAK04-81	18YAK04	yakuba	9	28	20190508	2	M	5	H	U
18YAK05b-39	18YAK05b	yakuba	9	32	20190508	1	F	6	A	U	uninfected, confirmed
18YAK05b-39	18YAK05b	yakuba	9	32	20190508	2	M	6	B	I
18YAK02-53	18YAK02	yakuba	9	35	20190508	1	F	6	C	I
18YAK02-53	18YAK02	yakuba	9	35	20190508	2	F	6	D	I
18YAK02-53	18YAK02	yakuba	9	35	20190508	3	F	6	E	I
18YAK02-53	18YAK02	yakuba	9	35	20190508	4	F	6	F	I
18YAK02-53	18YAK02	yakuba	9	35	20190508	5	F	6	G	I
18YAK02-53	18YAK02	yakuba	9	35	20190508	6	F	6	H	I
18YAK02-53	18YAK02	yakuba	9	35	20190508	7	F	7	A	I
18YAK02-53	18YAK02	yakuba	9	35	20190508	8	F	7	B	I
18YAK02-53	18YAK02	yakuba	9	35	20190508	9	M	7	C	I
18YAK02-53	18YAK02	yakuba	9	35	20190508	10	M	7	D	I
18YAK02-53	18YAK02	yakuba	9	35	20190508	11	M	7	E	I
18YAK02-53	18YAK02	yakuba	9	35	20190508	12	M	7	F	I
18YAK02-53	18YAK02	yakuba	9	35	20190508	13	M	7	G	I
18YAK02-53	18YAK02	yakuba	9	35	20190508	14	M	7	H	I
18YAK02-53	18YAK02	yakuba	9	35	20190508	15	M	8	A	I
18YAK04-44	18YAK04	yakuba	9	36	20190508	1	F	8	B	I
18YAK04-44	18YAK04	yakuba	9	36	20190508	2	F	8	C	I
18YAK04-44	18YAK04	yakuba	9	36	20190508	3	F	8	D	I
18YAK04-44	18YAK04	yakuba	9	36	20190508	4	F	8	E	I
18YAK04-44	18YAK04	yakuba	9	36	20190508	5	F	8	F	I
18YAK04-44	18YAK04	yakuba	9	36	20190508	6	M	8	G	I
18YAK04-44	18YAK04	yakuba	9	36	20190508	7	M	8	H	I
18YAK04-78	18YAK04	yakuba	9	37	20190508	1	F	9	A	U
18YAK04-78	18YAK04	yakuba	9	37	20190508	2	F	9	B	U
18YAK04-78	18YAK04	yakuba	9	37	20190508	3	F	9	C	U
18YAK04-78	18YAK04	yakuba	9	37	20190508	4	M	9	D	U
18YAK05b-47	18YAK05b	yakuba	9	43	20190508	1	F	9	E	I	low titer, confirmed
18YAK05b-47	18YAK05b	yakuba	9	43	20190508	2	F	9	F	U
18YAK05b-47	18YAK05b	yakuba	9	43	20190508	3	F	9	G	U
18YAK05b-47	18YAK05b	yakuba	9	43	20190508	4	F	9	H	I	low titer, confirmed
18YAK05b-47	18YAK05b	yakuba	9	43	20190508	5	M	10	A	U
18YAK05b-47	18YAK05b	yakuba	9	43	20190508	6	M	10	B	U
18YAK05b-47	18YAK05b	yakuba	9	43	20190508	7	M	10	C	U
18YAK05b-47	18YAK05b	yakuba	9	43	20190508	8	M	10	D	U
18YAK04-90	18YAK04	yakuba	9	44	20190508	1	F	10	E	I
18YAK04-90	18YAK04	yakuba	9	44	20190508	2	F	10	F	I
18YAK04-90	18YAK04	yakuba	9	44	20190508	3	F	10	G	I
18YAK04-90	18YAK04	yakuba	9	44	20190508	4	F	10	H	I
18YAK04-90	18YAK04	yakuba	9	44	20190508	5	M	11	A	I
18YAK04-90	18YAK04	yakuba	9	44	20190508	6	M	11	B	I
18YAK04-90	18YAK04	yakuba	9	44	20190508	7	M	11	C	I
18YAK04-90	18YAK04	yakuba	9	44	20190508	8	M	11	D	I
18YAK04-90	18YAK04	yakuba	9	44	20190508	9	M	11	E	I
18YAK04-90	18YAK04	yakuba	9	44	20190508	10	M	11	F	I
18YAK04-90	18YAK04	yakuba	9	44	20190508	11	M	11	G	I
18YAK04-90	18YAK04	yakuba	9	44	20190508	12	M	11	H	I
18YAK05b-44	18YAK05b	yakuba	9	45	20190508	1	F	12	A	U	uninfected, confirmed
18YAK05b-44	18YAK05b	yakuba	9	45	20190508	2	F	12	B	U
18YAK05b-44	18YAK05b	yakuba	9	45	20190508	3	M	12	C	I	low titer, confirmed
18YAK05b-44	18YAK05b	yakuba	9	45	20190508	4	M	12	D	U
18YAK05b-44	18YAK05b	yakuba	9	45	20190508	5	M	12	E	I	low titer
18YAK05b-44	18YAK05b	yakuba	9	45	20190509	6	F	1	A	U	uninfected, confirmed
18YAK05b-44	18YAK05b	yakuba	9	45	20190509	7	M	1	B	U
18YAK05b-44	18YAK05b	yakuba	9	45	20190509	8	M	1	C	I	low titer, confirmed
18YAK05b-44	18YAK05b	yakuba	9	45	20190509	9	M	1	D	I	low titer, confirmed
18YAK05b-44	18YAK05b	yakuba	9	45	20190509	10	M	1	E	I
18YAK05b-44	18YAK05b	yakuba	9	45	20190509	11	M	1	F	U
18YAK05b-35	18YAK05b	yakuba	9	46	20190509	1	F	1	G	I
18YAK05b-35	18YAK05b	yakuba	9	46	20190509	2	F	1	H	U
18YAK05b-35	18YAK05b	yakuba	9	46	20190509	3	F	2	A	U	uninfected, confirmed
18YAK05b-35	18YAK05b	yakuba	9	46	20190509	4	F	2	B	U
18YAK05b-35	18YAK05b	yakuba	9	46	20190509	5	F	2	C	U
18YAK05b-35	18YAK05b	yakuba	9	46	20190509	6	F	2	D	U
18YAK05b-35	18YAK05b	yakuba	9	46	20190509	7	F	2	E	U
18YAK05b-35	18YAK05b	yakuba	9	46	20190509	8	F	2	F	U
18YAK05b-35	18YAK05b	yakuba	9	46	20190509	9	F	2	G	U
18YAK05b-35	18YAK05b	yakuba	9	46	20190509	10	M	2	H	U
18YAK05b-35	18YAK05b	yakuba	9	46	20190509	11	M	3	A	U
18YAK05b-35	18YAK05b	yakuba	9	46	20190509	12	M	3	B	U
18YAK05b-35	18YAK05b	yakuba	9	46	20190509	13	M	3	C	U
18YAK05b-35	18YAK05b	yakuba	9	46	20190509	14	M	3	D	U
18YAK05b-35	18YAK05b	yakuba	9	46	20190509	15	M	3	E	U
18YAK05b-35	18YAK05b	yakuba	9	46	20190509	16	M	3	F	U
18YAK05b-35	18YAK05b	yakuba	9	46	20190509	17	M	3	G	I
18YAK05b-35	18YAK05b	yakuba	9	46	20190509	18	M	3	H	U
18YAK05b-35	18YAK05b	yakuba	9	46	20190509	19	M	4	A	I
18YAK02-50	18YAK02	yakuba	9	48	20190509	1	F	4	B	I
18YAK02-50	18YAK02	yakuba	9	48	20190509	2	F	4	C	I
18YAK02-50	18YAK02	yakuba	9	48	20190509	3	F	4	D	I
18YAK02-50	18YAK02	yakuba	9	48	20190509	4	F	4	E	I
18YAK02-50	18YAK02	yakuba	9	48	20190509	5	F	4	F	I
18YAK02-50	18YAK02	yakuba	9	48	20190509	6	M	4	G	I
18YAK02-50	18YAK02	yakuba	9	48	20190509	7	M	4	H	I
18YAK02-50	18YAK02	yakuba	9	48	20190509	8	M	5	A	I
18YAK02-50	18YAK02	yakuba	9	48	20190509	9	M	5	B	I
18YAK02-50	18YAK02	yakuba	9	48	20190509	10	M	5	C	I
18YAK02-50	18YAK02	yakuba	9	48	20190509	11	M	5	D	I
18YAK04-70	18YAK04	yakuba	9	50	20190509	1	F	5	E	I
18YAK04-70	18YAK04	yakuba	9	50	20190509	2	F	5	F	I
18YAK04-70	18YAK04	yakuba	9	50	20190509	3	F	5	G	I
18YAK04-70	18YAK04	yakuba	9	50	20190509	4	F	5	H	I
18YAK04-70	18YAK04	yakuba	9	50	20190509	5	F	6	A	I
18YAK04-70	18YAK04	yakuba	9	50	20190509	6	F	6	B	I
18YAK04-70	18YAK04	yakuba	9	50	20190509	7	F	6	C	I
18YAK04-70	18YAK04	yakuba	9	50	20190509	8	M	6	D	I
18YAK04-70	18YAK04	yakuba	9	50	20190509	9	M	6	E	I
18YAK04-70	18YAK04	yakuba	9	50	20190509	10	M	6	F	I
18YAK04-70	18YAK04	yakuba	9	50	20190509	11	M	6	G	I
18YAK04-22	18YAK04	yakuba	9	51	20190509	1	M	6	H	I
18YAK02-34	18YAK02	yakuba	9	52	20190509	1	F	7	A	U
18YAK02-34	18YAK02	yakuba	9	52	20190509	2	F	7	B	U
18YAK02-34	18YAK02	yakuba	9	52	20190509	3	F	7	C	U
18YAK02-34	18YAK02	yakuba	9	52	20190509	4	F	7	D	U
18YAK02-34	18YAK02	yakuba	9	52	20190509	5	F	7	E	U
18YAK02-34	18YAK02	yakuba	9	52	20190509	6	F	7	F	U
18YAK02-34	18YAK02	yakuba	9	52	20190509	7	M	7	G	I	low titer, confirmed
18YAK02-34	18YAK02	yakuba	9	52	20190509	8	M	7	H	U
18YAK02-34	18YAK02	yakuba	9	52	20190509	9	M	8	A	U
18YAK02-34	18YAK02	yakuba	9	52	20190509	10	M	8	B	U
18YAK02-34	18YAK02	yakuba	9	52	20190509	11	M	8	C	U
18YAK02-34	18YAK02	yakuba	9	52	20190509	12	M	8	D	U
18YAK05b-46	18YAK05b	yakuba	9	53	20190509	1	F	8	E	I
18YAK05b-46	18YAK05b	yakuba	9	53	20190509	2	F	8	F	I
18YAK05b-46	18YAK05b	yakuba	9	53	20190509	3	F	8	G	I
18YAK05b-46	18YAK05b	yakuba	9	53	20190509	4	F	8	H	I
18YAK05b-46	18YAK05b	yakuba	9	53	20190509	5	F	9	A	I
18YAK05b-46	18YAK05b	yakuba	9	53	20190509	6	F	9	B	I
18YAK05b-46	18YAK05b	yakuba	9	53	20190509	7	F	9	C	I
18YAK05b-46	18YAK05b	yakuba	9	53	20190509	8	F	9	D	I
18YAK05b-46	18YAK05b	yakuba	9	53	20190509	9	F	9	E	I
18YAK05b-46	18YAK05b	yakuba	9	53	20190509	10	M	9	F	I
18YAK05b-46	18YAK05b	yakuba	9	53	20190509	11	M	9	G	I
18YAK05b-46	18YAK05b	yakuba	9	53	20190509	12	M	9	H	I
18YAK05b-46	18YAK05b	yakuba	9	53	20190509	13	M	10	A	I
18YAK05b-46	18YAK05b	yakuba	9	53	20190509	14	M	10	B	I
18YAK05b-46	18YAK05b	yakuba	9	53	20190509	15	M	10	C	I
18YAK05b-46	18YAK05b	yakuba	9	53	20190509	16	M	10	D	I
18YAK05b-46	18YAK05b	yakuba	9	53	20190509	17	M	10	E	I
18YAK05b-46	18YAK05b	yakuba	9	53	20190509	18	M	10	F	I
18YAK05b-46	18YAK05b	yakuba	9	53	20190509	19	M	10	G	I
18YAK02-48	18YAK02	yakuba	9	57	20190509	1	F	10	H	U
18YAK02-48	18YAK02	yakuba	9	57	20190509	2	F	11	A	U
18YAK02-48	18YAK02	yakuba	9	57	20190509	3	F	11	B	U
18YAK02-48	18YAK02	yakuba	9	57	20190509	4	F	11	C	U
18YAK02-48	18YAK02	yakuba	9	57	20190509	5	F	11	D	U
18YAK02-48	18YAK02	yakuba	9	57	20190509	6	M	11	E	U
18YAK02-48	18YAK02	yakuba	9	57	20190509	7	M	11	F	U
18YAK05-02	18YAK05	yakuba	9	58	20190509	1	F	11	G	I
18YAK05-02	18YAK05	yakuba	9	58	20190509	2	M	11	H	I
18YAK04-69	18YAK04	yakuba	9	59	20190509	1	F	12	A	I
18YAK04-69	18YAK04	yakuba	9	59	20190509	2	F	12	B	I
18YAK04-69	18YAK04	yakuba	9	59	20190509	3	F	12	C	I
18YAK04-69	18YAK04	yakuba	9	59	20190509	4	F	12	D	I
18YAK04-69	18YAK04	yakuba	9	59	20190509	5	M	12	E	I
18YAK04-69	18YAK04	yakuba	9	59	20190510	6	F	1	A	I
18YAK04-69	18YAK04	yakuba	9	59	20190510	7	F	1	B	I
18YAK04-69	18YAK04	yakuba	9	59	20190510	8	F	1	C	I
18YAK04-69	18YAK04	yakuba	9	59	20190510	9	F	1	D	I
18YAK04-69	18YAK04	yakuba	9	59	20190510	10	F	1	E	I
18YAK04-69	18YAK04	yakuba	9	59	20190510	11	F	1	F	NA	failed DNA extraction
18YAK04-69	18YAK04	yakuba	9	59	20190510	12	M	1	G	I
18YAK04-69	18YAK04	yakuba	9	59	20190510	13	M	1	H	I
18YAK04-69	18YAK04	yakuba	9	59	20190510	14	M	2	A	I
18YAK04-69	18YAK04	yakuba	9	59	20190510	15	M	2	B	I
18YAK05b-21	18YAK05b	yakuba	9	60	20190510	1	F	2	C	I
18YAK05b-21	18YAK05b	yakuba	9	60	20190510	2	F	2	D	I
18YAK05b-21	18YAK05b	yakuba	9	60	20190510	3	M	2	E	I
18YAK05b-21	18YAK05b	yakuba	9	60	20190510	4	M	2	F	I
18YAK05b-21	18YAK05b	yakuba	9	60	20190510	5	M	2	G	I
18YAK05b-21	18YAK05b	yakuba	9	60	20190510	6	M	2	H	I
18YAK05b-21	18YAK05b	yakuba	9	60	20190510	7	M	3	A	I
18YAK05b-21	18YAK05b	yakuba	9	60	20190510	8	M	3	B	I
18YAK02-54	18YAK02	yakuba	9	61	20190510	1	F	3	C	I
18YAK02-54	18YAK02	yakuba	9	61	20190510	2	F	3	D	I
18YAK02-54	18YAK02	yakuba	9	61	20190510	3	F	3	E	I
18YAK02-54	18YAK02	yakuba	9	61	20190510	4	M	3	F	I
18YAK02-54	18YAK02	yakuba	9	61	20190510	5	M	3	G	I
18YAK02-54	18YAK02	yakuba	9	61	20190510	6	M	3	H	I
18YAK02-54	18YAK02	yakuba	9	61	20190510	7	M	4	A	I
18YAK02-54	18YAK02	yakuba	9	61	20190510	8	M	4	B	I
18YAK02-54	18YAK02	yakuba	9	61	20190510	9	M	4	C	I
18YAK02-54	18YAK02	yakuba	9	61	20190510	10	M	4	D	I
18YAK02-54	18YAK02	yakuba	9	61	20190510	11	M	4	E	I
18YAK02-54	18YAK02	yakuba	9	61	20190510	12	M	4	F	I
18YAK02-54	18YAK02	yakuba	9	61	20190510	13	M	4	G	I
18YAK02-40	18YAK02	yakuba	9	63	20190510	1	M	4	H	U	uninfected, confirmed
18YAK05b-09	18YAK05b	yakuba	9	65	20190510	1	F	5	A	I
18YAK05b-09	18YAK05b	yakuba	9	65	20190510	2	F	5	B	I
18YAK05b-09	18YAK05b	yakuba	9	65	20190510	3	F	5	C	I
18YAK05b-09	18YAK05b	yakuba	9	65	20190510	4	F	5	D	I
18YAK05b-09	18YAK05b	yakuba	9	65	20190510	5	F	5	E	I
18YAK05b-09	18YAK05b	yakuba	9	65	20190510	6	F	5	F	I
18YAK05b-09	18YAK05b	yakuba	9	65	20190510	7	M	5	G	I
18YAK05b-09	18YAK05b	yakuba	9	65	20190510	8	M	5	H	I
18YAK05b-09	18YAK05b	yakuba	9	65	20190510	9	M	6	A	I
18YAK05b-09	18YAK05b	yakuba	9	65	20190510	10	M	6	B	I
18YAK05b-09	18YAK05b	yakuba	9	65	20190510	11	M	6	C	I
18YAK02-51	18YAK02	yakuba	9	66	20190510	1	F	6	D	I
18YAK02-51	18YAK02	yakuba	9	66	20190510	2	F	6	E	I
18YAK02-51	18YAK02	yakuba	9	66	20190510	3	F	6	F	I
18YAK02-51	18YAK02	yakuba	9	66	20190510	4	F	6	G	I
18YAK02-51	18YAK02	yakuba	9	66	20190510	5	F	6	H	I
18YAK02-51	18YAK02	yakuba	9	66	20190510	6	F	7	A	I
18YAK02-51	18YAK02	yakuba	9	66	20190510	7	F	7	B	I
18YAK02-51	18YAK02	yakuba	9	66	20190510	8	M	7	C	I
18YAK02-51	18YAK02	yakuba	9	66	20190510	9	M	7	D	I
18YAK02-51	18YAK02	yakuba	9	66	20190510	10	M	7	E	I
18YAK02-51	18YAK02	yakuba	9	66	20190510	11	M	7	F	I
18YAK02-51	18YAK02	yakuba	9	66	20190510	12	M	7	G	I
18YAK02-51	18YAK02	yakuba	9	66	20190510	13	M	7	H	I
18YAK02-51	18YAK02	yakuba	9	66	20190510	14	M	8	A	I
18YAK02-51	18YAK02	yakuba	9	66	20190510	15	M	8	B	I
18YAK02-51	18YAK02	yakuba	9	66	20190510	16	M	8	C	I
18YAK02-52	18YAK02	yakuba	9	67	20190510	1	F	8	D	U
18YAK02-52	18YAK02	yakuba	9	67	20190510	2	M	8	E	U
18YAK02-52	18YAK02	yakuba	9	67	20190510	3	M	8	F	U
18YAK02-52	18YAK02	yakuba	9	67	20190510	4	M	8	G	U
18YAK02-52	18YAK02	yakuba	9	67	20190510	5	M	8	H	U
18YAK04-75	18YAK04	yakuba	9	68	20190510	1	F	9	A	I
18YAK04-75	18YAK04	yakuba	9	68	20190510	2	F	9	B	I
18YAK04-75	18YAK04	yakuba	9	68	20190510	3	F	9	C	I
18YAK04-75	18YAK04	yakuba	9	68	20190510	4	F	9	D	I
18YAK04-75	18YAK04	yakuba	9	68	20190510	5	F	9	E	I
18YAK04-75	18YAK04	yakuba	9	68	20190510	6	F	9	F	I
18YAK04-75	18YAK04	yakuba	9	68	20190510	7	F	9	G	I
18YAK04-75	18YAK04	yakuba	9	68	20190510	8	F	9	H	I
18YAK04-75	18YAK04	yakuba	9	68	20190510	9	M	10	A	I
18YAK04-75	18YAK04	yakuba	9	68	20190510	10	M	10	B	I
18YAK04-75	18YAK04	yakuba	9	68	20190510	11	M	10	C	I
18YAK04-75	18YAK04	yakuba	9	68	20190510	12	M	10	D	I
18YAK04-75	18YAK04	yakuba	9	68	20190510	13	M	10	E	I
18YAK04-75	18YAK04	yakuba	9	68	20190510	14	M	10	F	I
18YAK04-75	18YAK04	yakuba	9	68	20190510	15	M	10	G	I
18YAK04-37	18YAK04	yakuba	9	71	20190510	1	F	10	H	I
18YAK04-37	18YAK04	yakuba	9	71	20190510	2	F	11	A	I
18YAK04-37	18YAK04	yakuba	9	71	20190510	3	F	11	B	I
18YAK04-37	18YAK04	yakuba	9	71	20190510	4	F	11	C	I
18YAK04-37	18YAK04	yakuba	9	71	20190510	5	F	11	D	I
18YAK04-37	18YAK04	yakuba	9	71	20190510	6	F	11	E	I
18YAK04-37	18YAK04	yakuba	9	71	20190510	7	M	11	F	I
18YAK04-37	18YAK04	yakuba	9	71	20190510	8	M	11	G	I
18YAK04-37	18YAK04	yakuba	9	71	20190510	9	M	11	H	I
18YAK04-37	18YAK04	yakuba	9	71	20190510	10	M	12	A	I
18YAK04-37	18YAK04	yakuba	9	71	20190510	11	M	12	B	I
18YAK04-37	18YAK04	yakuba	9	71	20190510	12	M	12	C	I
18YAK04-37	18YAK04	yakuba	9	71	20190510	13	M	12	D	I
18YAK04-37	18YAK04	yakuba	9	71	20190510	14	M	12	E	I
18YAK04-37	18YAK04	yakuba	9	71	20190514	15	M	1	A	I
18YAK04-37	18YAK04	yakuba	9	71	20190514	16	M	1	B	I
18YAK04-37	18YAK04	yakuba	9	71	20190514	17	M	1	C	I
18YAK04-37	18YAK04	yakuba	9	71	20190514	18	M	1	D	I
18YAK04-37	18YAK04	yakuba	9	71	20190514	19	M	1	E	I
18YAK04-37	18YAK04	yakuba	9	71	20190514	20	M	1	F	I
18YAK04-86	18YAK04	yakuba	9	73	20190514	1	F	1	G	I
18YAK04-86	18YAK04	yakuba	9	73	20190514	2	F	1	H	I
18YAK04-86	18YAK04	yakuba	9	73	20190514	3	F	2	A	I
18YAK04-86	18YAK04	yakuba	9	73	20190514	4	F	2	B	I
18YAK04-86	18YAK04	yakuba	9	73	20190514	5	F	2	C	I
18YAK04-86	18YAK04	yakuba	9	73	20190514	6	F	2	D	I
18YAK04-86	18YAK04	yakuba	9	73	20190514	7	F	2	E	I
18YAK04-86	18YAK04	yakuba	9	73	20190514	8	M	2	F	I
18YAK04-86	18YAK04	yakuba	9	73	20190514	9	M	2	G	I
18YAK04-86	18YAK04	yakuba	9	73	20190514	10	M	2	H	I
18YAK04-86	18YAK04	yakuba	9	73	20190514	11	M	3	A	I
18YAK04-86	18YAK04	yakuba	9	73	20190514	12	M	3	B	I
18YAK04-65	18YAK04	yakuba	9	74	20190514	1	F	3	C	U	uninfected, confirmed
18YAK04-65	18YAK04	yakuba	9	74	20190514	2	F	3	D	U
18YAK04-65	18YAK04	yakuba	9	74	20190514	3	F	3	E	U
18YAK04-65	18YAK04	yakuba	9	74	20190514	4	F	3	F	U
18YAK04-65	18YAK04	yakuba	9	74	20190514	5	F	3	G	U
18YAK04-65	18YAK04	yakuba	9	74	20190514	6	F	3	H	U	uninfected, confirmed
18YAK04-65	18YAK04	yakuba	9	74	20190514	7	F	4	A	U
18YAK04-65	18YAK04	yakuba	9	74	20190514	8	F	4	B	U
18YAK04-65	18YAK04	yakuba	9	74	20190514	9	F	4	C	I	low titer, confirmed
18YAK04-65	18YAK04	yakuba	9	74	20190514	10	M	4	D	U
18YAK04-65	18YAK04	yakuba	9	74	20190514	11	M	4	E	U
18YAK04-65	18YAK04	yakuba	9	74	20190514	12	M	4	F	U
18YAK04-65	18YAK04	yakuba	9	74	20190514	13	M	4	G	U
18YAK04-65	18YAK04	yakuba	9	74	20190514	14	M	4	H	U
18YAK04-84	18YAK04	yakuba	9	76	20190514	1	F	5	A	I
18YAK04-84	18YAK04	yakuba	9	76	20190514	2	F	5	B	I
18YAK04-84	18YAK04	yakuba	9	76	20190514	3	F	5	C	I
18YAK04-84	18YAK04	yakuba	9	76	20190514	4	F	5	D	I
18YAK04-84	18YAK04	yakuba	9	76	20190514	5	M	5	E	I
18YAK04-84	18YAK04	yakuba	9	76	20190514	6	M	5	F	I
18YAK04-84	18YAK04	yakuba	9	76	20190514	7	M	5	G	I
18YAK04-84	18YAK04	yakuba	9	76	20190514	8	M	5	H	I
18YAK04-84	18YAK04	yakuba	9	76	20190514	9	M	6	A	I
18YAK04-84	18YAK04	yakuba	9	76	20190514	10	M	6	B	I
18YAK04-35	18YAK04	yakuba	9	78	20190514	1	F	6	C	I
18YAK04-35	18YAK04	yakuba	9	78	20190514	2	F	6	D	I
18YAK04-35	18YAK04	yakuba	9	78	20190514	3	M	6	E	I
18YAK02-36	18YAK02	yakuba	9	79	20190514	1	F	6	F	I
18YAK02-36	18YAK02	yakuba	9	79	20190514	2	F	6	G	I
18YAK02-36	18YAK02	yakuba	9	79	20190514	3	F	6	H	I
18YAK02-36	18YAK02	yakuba	9	79	20190514	4	F	7	A	I
18YAK02-36	18YAK02	yakuba	9	79	20190514	5	F	7	B	I
18YAK02-36	18YAK02	yakuba	9	79	20190514	6	M	7	C	I
18YAK02-36	18YAK02	yakuba	9	79	20190514	7	M	7	D	I
18YAK02-36	18YAK02	yakuba	9	79	20190514	8	M	7	E	I
18YAK04-55_1	18YAK04	yakuba	10	8	20190514	1	F	7	F	I
18YAK04-55_1	18YAK04	yakuba	10	8	20190514	2	F	7	G	I
18YAK04-55_1	18YAK04	yakuba	10	8	20190514	3	F	7	H	I
18YAK04-55_1	18YAK04	yakuba	10	8	20190514	4	M	8	A	I
18YAK04-55_1	18YAK04	yakuba	10	8	20190514	5	M	8	B	I
18YAK04-46	18YAK04	yakuba	10	9	20190514	1	F	8	C	I
18YAK04-46	18YAK04	yakuba	10	9	20190514	2	F	8	D	I
18YAK04-46	18YAK04	yakuba	10	9	20190514	3	F	8	E	I
18YAK04-46	18YAK04	yakuba	10	9	20190514	4	F	8	F	I
18YAK04-46	18YAK04	yakuba	10	9	20190514	5	F	8	G	I
18YAK04-46	18YAK04	yakuba	10	9	20190514	6	F	8	H	I
18YAK04-46	18YAK04	yakuba	10	9	20190514	7	F	9	A	I
18YAK04-46	18YAK04	yakuba	10	9	20190514	8	F	9	B	I
18YAK04-46	18YAK04	yakuba	10	9	20190514	9	F	9	C	I
18YAK04-46	18YAK04	yakuba	10	9	20190514	10	F	9	D	I
18YAK04-46	18YAK04	yakuba	10	9	20190514	11	M	9	E	I
18YAK04-46	18YAK04	yakuba	10	9	20190514	12	M	9	F	I
18YAK04-46	18YAK04	yakuba	10	9	20190514	13	M	9	G	I
18YAK04-46	18YAK04	yakuba	10	9	20190514	14	M	9	H	I
18YAK04-46	18YAK04	yakuba	10	9	20190514	15	M	10	A	I
18YAK04-46	18YAK04	yakuba	10	9	20190514	16	M	10	B	I
18YAK04-46	18YAK04	yakuba	10	9	20190514	17	M	10	C	I
18YAK04-46	18YAK04	yakuba	10	9	20190514	18	M	10	D	I
18YAK04-46	18YAK04	yakuba	10	9	20190514	19	M	10	E	I
18YAK04-26	18YAK04	yakuba	10	10	20190514	1	F	10	F	I
18YAK04-26	18YAK04	yakuba	10	10	20190514	2	F	10	G	I
18YAK04-26	18YAK04	yakuba	10	10	20190514	3	M	10	H	I
18YAK04-26	18YAK04	yakuba	10	10	20190514	4	M	11	A	I
18YAK02-35	18YAK02	yakuba	10	11	20190514	1	F	11	B	I
18YAK02-35	18YAK02	yakuba	10	11	20190514	2	F	11	C	I
18YAK02-35	18YAK02	yakuba	10	11	20190514	3	F	11	D	I
18YAK02-35	18YAK02	yakuba	10	11	20190514	4	F	11	E	I
18YAK02-35	18YAK02	yakuba	10	11	20190514	5	M	11	F	I
18YAK02-35	18YAK02	yakuba	10	11	20190514	6	M	11	G	I
18YAK02-35	18YAK02	yakuba	10	11	20190514	7	M	11	H	I
18YAK02-35	18YAK02	yakuba	10	11	20190514	8	NA	12	A	I
18YAK02-01	18YAK02	yakuba	10	14	20190514	1	F	12	B	I
18YAK02-01	18YAK02	yakuba	10	14	20190514	2	F	12	C	I
18YAK02-01	18YAK02	yakuba	10	14	20190514	3	F	12	D	I
18YAK02-01	18YAK02	yakuba	10	14	20190514	4	M	12	E	I
18YAK02-01	18YAK02	yakuba	10	14	20190520	5	F	1	A	I
18YAK02-01	18YAK02	yakuba	10	14	20190520	6	F	1	B	I
18YAK02-38_1	18YAK02	yakuba	10	17	20190520	1	F	1	C	I
18YAK02-38_1	18YAK02	yakuba	10	17	20190520	2	F	1	D	I
18YAK02-38_1	18YAK02	yakuba	10	17	20190520	3	F	1	E	I
18YAK02-38_1	18YAK02	yakuba	10	17	20190520	4	F	1	F	I
18YAK02-38_1	18YAK02	yakuba	10	17	20190520	5	M	1	G	I
18YAK02-38_1	18YAK02	yakuba	10	17	20190520	6	M	1	H	I
18YAK02-38_1	18YAK02	yakuba	10	17	20190520	7	M	2	A	I
18YAK02-38_1	18YAK02	yakuba	10	17	20190520	8	M	2	B	I
18YAK02-38_1	18YAK02	yakuba	10	17	20190520	9	M	2	C	I
18YAK02-37	18YAK02	yakuba	10	18	20190520	1	F	2	D	I
18YAK02-37	18YAK02	yakuba	10	18	20190520	2	F	2	E	I
18YAK02-37	18YAK02	yakuba	10	18	20190520	3	F	2	F	I
18YAK02-37	18YAK02	yakuba	10	18	20190520	4	F	2	G	I
18YAK02-37	18YAK02	yakuba	10	18	20190520	5	F	2	H	I
18YAK02-37	18YAK02	yakuba	10	18	20190520	6	M	3	A	I
18YAK02-37	18YAK02	yakuba	10	18	20190520	7	M	3	B	I
18YAK02-37	18YAK02	yakuba	10	18	20190520	8	M	3	C	I
18YAK02-37	18YAK02	yakuba	10	18	20190520	9	M	3	D	I
18YAK02-37	18YAK02	yakuba	10	18	20190520	10	M	3	E	I
18YAK02-21	18YAK02	yakuba	10	21	20190520	1	F	3	F	I
18YAK02-21	18YAK02	yakuba	10	21	20190520	2	F	3	G	I
18YAK02-21	18YAK02	yakuba	10	21	20190520	3	M	3	H	I
18YAK02-21	18YAK02	yakuba	10	21	20190520	4	M	4	A	I
18YAK02-21	18YAK02	yakuba	10	21	20190520	5	M	4	B	I
18YAK02-21	18YAK02	yakuba	10	21	20190520	6	NA	4	C	I
18YAK02-21	18YAK02	yakuba	10	21	20190520	7	NA	4	D	I
18YAK02-21	18YAK02	yakuba	10	21	20190520	8	NA	4	E	I
18YAK02-21	18YAK02	yakuba	10	21	20190520	9	NA	4	F	I
18YAK02-21	18YAK02	yakuba	10	21	20190520	10	NA	4	G	I
18YAK02-21	18YAK02	yakuba	10	21	20190520	11	NA	4	H	I
18YAK04-55_2	18YAK04	yakuba	10	22	20190520	1	F	5	A	I
18YAK04-55_2	18YAK04	yakuba	10	22	20190520	2	M	5	B	I
18YAK04-55_2	18YAK04	yakuba	10	22	20190520	3	M	5	C	I
18YAK02-04	18YAK02	yakuba	10	23	20190520	1	F	5	D	I
18YAK02-04	18YAK02	yakuba	10	23	20190520	2	F	5	E	I
18YAK02-04	18YAK02	yakuba	10	23	20190520	3	F	5	F	I
18YAK02-04	18YAK02	yakuba	10	23	20190520	4	F	5	G	I
18YAK02-04	18YAK02	yakuba	10	23	20190520	5	F	5	H	I
18YAK02-04	18YAK02	yakuba	10	23	20190520	6	F	6	A	I
18YAK02-04	18YAK02	yakuba	10	23	20190520	7	M	6	B	I
18YAK02-04	18YAK02	yakuba	10	23	20190520	8	M	6	C	I
18YAK02-04	18YAK02	yakuba	10	23	20190520	9	M	6	D	I
18YAK02-04	18YAK02	yakuba	10	23	20190520	10	M	6	E	I
18YAK02-04	18YAK02	yakuba	10	23	20190520	11	M	6	F	I
18YAK02-04	18YAK02	yakuba	10	23	20190520	12	M	6	G	I
18YAK02-04	18YAK02	yakuba	10	23	20190520	13	M	6	H	I
18YAK02-04	18YAK02	yakuba	10	23	20190520	14	M	7	A	I
18YAK02-04	18YAK02	yakuba	10	23	20190520	15	M	7	B	I
18YAK04-39	18YAK04	yakuba	10	27	20190520	1	F	7	C	U
18YAK04-39	18YAK04	yakuba	10	27	20190520	2	F	7	D	U
18YAK04-39	18YAK04	yakuba	10	27	20190520	3	F	7	E	U
18YAK04-39	18YAK04	yakuba	10	27	20190520	4	F	7	F	U
18YAK04-39	18YAK04	yakuba	10	27	20190520	5	F	7	G	U
18YAK04-39	18YAK04	yakuba	10	27	20190520	6	F	7	H	U
18YAK04-39	18YAK04	yakuba	10	27	20190520	7	F	8	A	U
18YAK04-39	18YAK04	yakuba	10	27	20190520	8	F	8	B	U
18YAK04-39	18YAK04	yakuba	10	27	20190520	9	F	8	C	U
18YAK04-39	18YAK04	yakuba	10	27	20190520	10	F	8	D	U
18YAK04-39	18YAK04	yakuba	10	27	20190520	11	F	8	E	U
18YAK04-39	18YAK04	yakuba	10	27	20190520	12	M	8	F	U
18YAK04-39	18YAK04	yakuba	10	27	20190520	13	M	8	G	U
18YAK04-39	18YAK04	yakuba	10	27	20190520	14	M	8	H	U
18YAK04-39	18YAK04	yakuba	10	27	20190520	15	M	9	A	U
18YAK04-39	18YAK04	yakuba	10	27	20190520	16	M	9	B	U
18YAK04-39	18YAK04	yakuba	10	27	20190520	17	M	9	C	U
18YAK04-39	18YAK04	yakuba	10	27	20190520	18	M	9	D	I
18YAK04-39	18YAK04	yakuba	10	27	20190520	19	M	9	E	I
18YAK04-39	18YAK04	yakuba	10	27	20190520	20	M	9	F	I
18YAK04-39	18YAK04	yakuba	10	27	20190520	21	M	9	G	I
18YAK04-39	18YAK04	yakuba	10	27	20190520	22	M	9	H	I
18YAK04-39	18YAK04	yakuba	10	27	20190520	23	M	10	A	U
18YAK04-39	18YAK04	yakuba	10	27	20190520	24	M	10	B	U
18YAK04-39	18YAK04	yakuba	10	27	20190520	25	M	10	C	U
18YAK02-02	18YAK02	yakuba	10	28	20190520	1	F	10	D	I
18YAK02-02	18YAK02	yakuba	10	28	20190520	2	F	10	E	I
18YAK02-02	18YAK02	yakuba	10	28	20190520	3	F	10	F	I
18YAK02-02	18YAK02	yakuba	10	28	20190520	4	F	10	G	I
18YAK02-02	18YAK02	yakuba	10	28	20190520	5	F	10	H	I
18YAK02-02	18YAK02	yakuba	10	28	20190520	6	M	11	A	I
18YAK02-02	18YAK02	yakuba	10	28	20190520	7	M	11	B	I
18YAK02-02	18YAK02	yakuba	10	28	20190520	8	M	11	C	I
18YAK02-28	18YAK02	yakuba	10	29	20190520	1	F	11	D	I
18YAK02-28	18YAK02	yakuba	10	29	20190520	2	F	11	E	I
18YAK02-28	18YAK02	yakuba	10	29	20190520	3	F	11	F	I
18YAK02-28	18YAK02	yakuba	10	29	20190520	4	F	11	G	I
18YAK02-28	18YAK02	yakuba	10	29	20190520	5	F	11	H	I
18YAK02-28	18YAK02	yakuba	10	29	20190520	6	F	12	A	I
18YAK02-28	18YAK02	yakuba	10	29	20190520	7	F	12	B	I
18YAK02-28	18YAK02	yakuba	10	29	20190520	8	M	12	C	I
18YAK02-28	18YAK02	yakuba	10	29	20190520	9	M	12	D	I
18YAK02-28	18YAK02	yakuba	10	29	20190520	10	M	12	E	I
18YAK02-10	18YAK02	yakuba	10	30	20190522	1	F	1	A	I
18YAK02-10	18YAK02	yakuba	10	30	20190522	2	F	1	B	I
18YAK02-10	18YAK02	yakuba	10	30	20190522	3	F	1	C	I
18YAK02-10	18YAK02	yakuba	10	30	20190522	4	F	1	D	U
18YAK02-10	18YAK02	yakuba	10	30	20190522	5	F	1	E	I
18YAK02-10	18YAK02	yakuba	10	30	20190522	6	F	1	F	I
18YAK02-10	18YAK02	yakuba	10	30	20190522	7	F	1	G	I
18YAK02-10	18YAK02	yakuba	10	30	20190522	8	F	1	H	I
18YAK02-10	18YAK02	yakuba	10	30	20190522	9	M	2	A	I
18YAK02-10	18YAK02	yakuba	10	30	20190522	10	M	2	B	I
18YAK02-10	18YAK02	yakuba	10	30	20190522	11	M	2	C	I
18YAK02-10	18YAK02	yakuba	10	30	20190522	12	M	2	D	I
18YAK02-10	18YAK02	yakuba	10	30	20190522	13	M	2	E	I
18YAK02-10	18YAK02	yakuba	10	30	20190522	14	M	2	F	I
18YAK02-10	18YAK02	yakuba	10	30	20190522	15	M	2	G	I
18YAK02-16	18YAK02	yakuba	10	35	20190522	1	F	2	H	I
18YAK02-16	18YAK02	yakuba	10	35	20190522	2	F	3	A	I
18YAK02-16	18YAK02	yakuba	10	35	20190522	3	F	3	B	I
18YAK02-16	18YAK02	yakuba	10	35	20190522	4	F	3	C	I
18YAK02-16	18YAK02	yakuba	10	35	20190522	5	F	3	D	I
18YAK02-16	18YAK02	yakuba	10	35	20190522	6	F	3	E	I
18YAK02-16	18YAK02	yakuba	10	35	20190522	7	M	3	F	I
18YAK04-24	18YAK04	yakuba	10	36	20190522	1	F	3	G	I
18YAK04-24	18YAK04	yakuba	10	36	20190522	2	F	3	H	I
18YAK04-24	18YAK04	yakuba	10	36	20190522	3	F	4	A	I
18YAK04-24	18YAK04	yakuba	10	36	20190522	4	F	4	B	I
18YAK04-24	18YAK04	yakuba	10	36	20190522	5	F	4	C	I
18YAK04-24	18YAK04	yakuba	10	36	20190522	6	F	4	D	I
18YAK04-24	18YAK04	yakuba	10	36	20190522	7	F	4	E	I
18YAK04-24	18YAK04	yakuba	10	36	20190522	8	F	4	F	I
18YAK04-24	18YAK04	yakuba	10	36	20190522	9	M	4	G	I
18YAK04-24	18YAK04	yakuba	10	36	20190522	10	M	4	H	I
18YAK04-24	18YAK04	yakuba	10	36	20190522	11	M	5	A	I
18YAK04-24	18YAK04	yakuba	10	36	20190522	12	M	5	B	I
18YAK02-38_2	18YAK02	yakuba	10	37	20190522	1	F	5	C	I
18YAK02-38_2	18YAK02	yakuba	10	37	20190522	2	F	5	D	I
18YAK02-38_2	18YAK02	yakuba	10	37	20190522	3	M	5	E	I
18YAK02-38_2	18YAK02	yakuba	10	37	20190522	4	M	5	F	I
18YAK04-28	18YAK04	yakuba	10	38	20190522	1	F	5	G	I
18YAK04-28	18YAK04	yakuba	10	38	20190522	2	M	5	H	I
18YAK02-20	18YAK02	yakuba	10	39	20190522	1	F	6	A	I
18YAK02-20	18YAK02	yakuba	10	39	20190522	2	F	6	B	I
18YAK02-20	18YAK02	yakuba	10	39	20190522	3	F	6	C	I
18YAK02-20	18YAK02	yakuba	10	39	20190522	4	F	6	D	I
18YAK02-20	18YAK02	yakuba	10	39	20190522	5	F	6	E	I
18YAK02-20	18YAK02	yakuba	10	39	20190522	6	M	6	F	I
18YAK02-20	18YAK02	yakuba	10	39	20190522	7	M	6	G	I
18YAK02-20	18YAK02	yakuba	10	39	20190522	8	M	6	H	I
18YAK02-20	18YAK02	yakuba	10	39	20190522	9	M	7	A	I
18YAK02-20	18YAK02	yakuba	10	39	20190522	10	M	7	B	I
18YAK02-20	18YAK02	yakuba	10	39	20190522	11	M	7	C	I
18YAK02-20	18YAK02	yakuba	10	39	20190522	12	NA	7	D	I
18YAK02-20	18YAK02	yakuba	10	39	20190522	13	NA	7	E	I
18YAK02-20	18YAK02	yakuba	10	39	20190522	14	NA	7	F	I
18YAK02-20	18YAK02	yakuba	10	39	20190522	15	NA	7	G	I
18YAK02-20	18YAK02	yakuba	10	39	20190522	16	NA	7	H	I
18YAK02-20	18YAK02	yakuba	10	39	20190522	17	NA	8	A	I
18YAK02-20	18YAK02	yakuba	10	39	20190522	18	NA	8	B	I
18YAK02-20	18YAK02	yakuba	10	39	20190522	19	NA	8	C	I
18YAK02-32	18YAK02	yakuba	10	40	20190522	1	F	8	D	I
18YAK02-32	18YAK02	yakuba	10	40	20190522	2	F	8	E	I
18YAK02-32	18YAK02	yakuba	10	40	20190522	3	F	8	F	I
18YAK02-32	18YAK02	yakuba	10	40	20190522	4	F	8	G	I
18YAK02-32	18YAK02	yakuba	10	40	20190522	5	F	8	H	I
18YAK02-32	18YAK02	yakuba	10	40	20190522	6	F	9	A	I
18YAK02-32	18YAK02	yakuba	10	40	20190522	7	F	9	B	I
18YAK02-32	18YAK02	yakuba	10	40	20190522	8	F	9	C	I
18YAK02-32	18YAK02	yakuba	10	40	20190522	9	F	9	D	I
18YAK02-32	18YAK02	yakuba	10	40	20190522	10	M	9	E	I
18YAK02-32	18YAK02	yakuba	10	40	20190522	11	M	9	F	I
18YAK02-32	18YAK02	yakuba	10	40	20190522	12	M	9	G	I
18YAK02-32	18YAK02	yakuba	10	40	20190522	13	M	9	H	I
18YAK02-32	18YAK02	yakuba	10	40	20190522	14	M	10	A	I
18YAK02-32	18YAK02	yakuba	10	40	20190522	15	M	10	B	I
18YAK02-32	18YAK02	yakuba	10	40	20190522	16	M	10	C	I
18YAK02-32	18YAK02	yakuba	10	40	20190522	17	M	10	D	I
18YAK02-32	18YAK02	yakuba	10	40	20190522	18	NA	10	E	I
18YAK04-71	18YAK04	yakuba	10	47	20190522	1	F	10	F	I
18YAK04-71	18YAK04	yakuba	10	47	20190522	2	F	10	G	I
18YAK04-71	18YAK04	yakuba	10	47	20190522	3	F	10	H	I
18YAK04-71	18YAK04	yakuba	10	47	20190522	4	F	11	A	I
18YAK04-71	18YAK04	yakuba	10	47	20190522	5	F	11	B	I
18YAK04-71	18YAK04	yakuba	10	47	20190522	6	F	11	C	I
18YAK04-71	18YAK04	yakuba	10	47	20190522	7	F	11	D	I
18YAK04-71	18YAK04	yakuba	10	47	20190522	8	F	11	E	I
18YAK04-71	18YAK04	yakuba	10	47	20190522	9	F	11	F	I
18YAK04-71	18YAK04	yakuba	10	47	20190522	10	F	11	G	I
18YAK04-71	18YAK04	yakuba	10	47	20190522	11	M	11	H	I
18YAK04-71	18YAK04	yakuba	10	47	20190522	12	M	12	A	I
18YAK04-71	18YAK04	yakuba	10	47	20190522	13	M	12	B	I
18YAK04-71	18YAK04	yakuba	10	47	20190522	14	M	12	C	I
18YAK04-71	18YAK04	yakuba	10	47	20190522	15	M	12	D	I
18YAK04-71	18YAK04	yakuba	10	47	20190522	16	M	12	E	I
18YAK04-71	18YAK04	yakuba	10	47	20190529	17	F	1	A	I
18YAK04-71	18YAK04	yakuba	10	47	20190529	18	F	1	B	I
18YAK04-71	18YAK04	yakuba	10	47	20190529	19	F	1	C	I
18YAK04-71	18YAK04	yakuba	10	47	20190529	20	F	1	D	I
18YAK04-71	18YAK04	yakuba	10	47	20190529	21	F	1	E	I
18YAK04-71	18YAK04	yakuba	10	47	20190529	22	F	1	F	I
18YAK04-71	18YAK04	yakuba	10	47	20190529	23	F	1	G	I
18YAK04-71	18YAK04	yakuba	10	47	20190529	24	F	1	H	I
18YAK04-71	18YAK04	yakuba	10	47	20190529	25	F	2	A	I
18YAK04-71	18YAK04	yakuba	10	47	20190529	26	F	2	B	I
18YAK04-71	18YAK04	yakuba	10	47	20190529	27	F	2	C	I
18YAK04-71	18YAK04	yakuba	10	47	20190529	28	F	2	D	I
18YAK04-71	18YAK04	yakuba	10	47	20190529	29	F	2	E	I
18YAK04-71	18YAK04	yakuba	10	47	20190529	30	F	2	F	I
18YAK04-71	18YAK04	yakuba	10	47	20190529	31	M	2	G	I
18YAK04-71	18YAK04	yakuba	10	47	20190529	32	M	2	H	I
18YAK04-71	18YAK04	yakuba	10	47	20190529	33	M	3	A	I
18YAK04-71	18YAK04	yakuba	10	47	20190529	34	M	3	B	I
18YAK04-71	18YAK04	yakuba	10	47	20190529	35	M	3	C	I
18YAK04-71	18YAK04	yakuba	10	47	20190529	36	M	3	D	I
18YAK04-71	18YAK04	yakuba	10	47	20190529	37	M	3	E	I
18YAK04-71	18YAK04	yakuba	10	47	20190529	38	M	3	F	I
18YAK04-71	18YAK04	yakuba	10	47	20190529	39	M	3	G	I
18YAK04-71	18YAK04	yakuba	10	47	20190529	40	M	3	H	I
18YAK04-71	18YAK04	yakuba	10	47	20190529	41	M	4	A	I
18YAK02-07	18YAK02	yakuba	10	58	20190529	1	F	4	B	I
18YAK02-07	18YAK02	yakuba	10	58	20190529	2	F	4	C	I	low titer, confirmed
18YAK02-07	18YAK02	yakuba	10	58	20190529	3	M	4	D	I
18YAK02-07	18YAK02	yakuba	10	58	20190529	4	M	4	E	I
18YAK02-07	18YAK02	yakuba	10	58	20190529	5	M	4	F	I
18YAK02-45	18YAK02	yakuba	10	68	20190529	1	F	4	G	I
18YAK02-45	18YAK02	yakuba	10	68	20190529	2	F	4	H	I
18YAK02-45	18YAK02	yakuba	10	68	20190529	3	F	5	A	I
18YAK02-45	18YAK02	yakuba	10	68	20190529	4	F	5	B	I
18YAK02-45	18YAK02	yakuba	10	68	20190529	5	F	5	C	I
18YAK02-45	18YAK02	yakuba	10	68	20190529	6	F	5	D	I
18YAK02-45	18YAK02	yakuba	10	68	20190529	7	F	5	E	I
18YAK02-45	18YAK02	yakuba	10	68	20190529	8	F	5	F	I
18YAK02-45	18YAK02	yakuba	10	68	20190529	9	F	5	G	I
18YAK02-45	18YAK02	yakuba	10	68	20190529	10	M	5	H	I
18YAK02-45	18YAK02	yakuba	10	68	20190529	11	M	6	A	I
18YAK02-45	18YAK02	yakuba	10	68	20190529	12	M	6	B	I
18YAK02-45	18YAK02	yakuba	10	68	20190529	13	M	6	C	I
18YAK02-45	18YAK02	yakuba	10	68	20190529	14	M	6	D	I
18YAK02-45	18YAK02	yakuba	10	68	20190529	15	M	6	E	I
18YAK02-45	18YAK02	yakuba	10	68	20190529	16	M	6	F	I
18YAK02-45	18YAK02	yakuba	10	68	20190529	17	M	6	G	I
18YAK02-45	18YAK02	yakuba	10	68	20190529	18	M	6	H	I
18YAK02-45	18YAK02	yakuba	10	68	20190529	19	M	7	A	I
18YAK02-200	18YAK02	yakuba	10	69	20190529	1	F	7	B	U
18YAK02-200	18YAK02	yakuba	10	69	20190529	2	F	7	C	U
18YAK02-200	18YAK02	yakuba	10	69	20190529	3	F	7	D	U
18YAK02-200	18YAK02	yakuba	10	69	20190529	4	F	7	E	U
18YAK02-200	18YAK02	yakuba	10	69	20190529	5	F	7	F	U
18YAK02-200	18YAK02	yakuba	10	69	20190529	6	F	7	G	U
18YAK02-200	18YAK02	yakuba	10	69	20190529	7	M	7	H	U
18YAK02-200	18YAK02	yakuba	10	69	20190529	8	M	8	A	U
18YAK02-200	18YAK02	yakuba	10	69	20190529	9	M	8	B	U
18YAK02-30_1	18YAK02	yakuba	11	6	20190529	1	F	8	C	I
18YAK02-30_1	18YAK02	yakuba	11	6	20190529	2	F	8	D	I
18YAK02-30_1	18YAK02	yakuba	11	6	20190529	3	F	8	E	I
18YAK02-30_1	18YAK02	yakuba	11	6	20190529	4	M	8	F	I
18YAK02-30_1	18YAK02	yakuba	11	6	20190529	5	M	8	G	I
18YAK02-30_1	18YAK02	yakuba	11	6	20190529	6	M	8	H	I
18YAK02-30_1	18YAK02	yakuba	11	6	20190529	7	M	9	A	I
18YAK02-31_1	18YAK02	yakuba	11	7	20190529	1	F	9	B	U
18YAK02-31_1	18YAK02	yakuba	11	7	20190529	2	F	9	C	U
18YAK02-31_1	18YAK02	yakuba	11	7	20190529	3	F	9	D	U
18YAK02-31_1	18YAK02	yakuba	11	7	20190529	4	F	9	E	U
18YAK02-31_1	18YAK02	yakuba	11	7	20190529	5	M	9	F	U
18YAK02-31_1	18YAK02	yakuba	11	7	20190529	6	M	9	G	U
18YAK02-31_1	18YAK02	yakuba	11	7	20190529	7	M	9	H	U
18YAK02-31_1	18YAK02	yakuba	11	7	20190529	8	M	10	A	U
18YAK02-31_1	18YAK02	yakuba	11	7	20190529	9	M	10	B	U
18YAK02-31_1	18YAK02	yakuba	11	7	20190529	10	M	10	C	U
18YAK02-31_1	18YAK02	yakuba	11	7	20190529	11	M	10	D	U
18YAK02-30_2	18YAK02	yakuba	11	8	20190529	1	F	10	E	I
18YAK02-30_2	18YAK02	yakuba	11	8	20190529	2	F	10	F	I
18YAK02-30_2	18YAK02	yakuba	11	8	20190529	3	F	10	G	I
18YAK02-30_2	18YAK02	yakuba	11	8	20190529	4	F	10	H	I
18YAK02-30_2	18YAK02	yakuba	11	8	20190529	5	M	11	A	I
18YAK02-31_2	18YAK02	yakuba	11	10	20190529	1	F	11	B	U
18YAK02-31_2	18YAK02	yakuba	11	10	20190529	2	F	11	C	U
18YAK02-31_2	18YAK02	yakuba	11	10	20190529	3	F	11	D	U
18YAK02-31_2	18YAK02	yakuba	11	10	20190529	4	M	11	E	U
18YAK02-31_2	18YAK02	yakuba	11	10	20190529	5	M	11	F	U
18YAK02-31_2	18YAK02	yakuba	11	10	20190529	6	M	11	G	U
18YAK02-46	18YAK02	yakuba	11	18	20190529	1	F	11	H	I
18YAK02-46	18YAK02	yakuba	11	18	20190529	2	F	12	A	I
18YAK02-46	18YAK02	yakuba	11	18	20190529	3	F	12	B	I
18YAK02-46	18YAK02	yakuba	11	18	20190529	4	F	12	C	I
18YAK02-46	18YAK02	yakuba	11	18	20190529	5	F	12	D	I
18YAK02-46	18YAK02	yakuba	11	18	20190529	6	M	12	E	I
18YAK02-46	18YAK02	yakuba	11	18	20190531	7	F	1	A	I
18YAK02-46	18YAK02	yakuba	11	18	20190531	8	F	1	B	I
18YAK02-46	18YAK02	yakuba	11	18	20190531	9	F	1	C	I
18YAK02-46	18YAK02	yakuba	11	18	20190531	10	F	1	D	I
18YAK02-46	18YAK02	yakuba	11	18	20190531	11	F	1	E	I
18YAK02-46	18YAK02	yakuba	11	18	20190531	12	F	1	F	I
18YAK02-46	18YAK02	yakuba	11	18	20190531	13	F	1	G	I
18YAK02-46	18YAK02	yakuba	11	18	20190531	14	F	1	H	I
18YAK02-46	18YAK02	yakuba	11	18	20190531	15	F	2	A	I
18YAK02-46	18YAK02	yakuba	11	18	20190531	16	F	2	B	I
18YAK02-46	18YAK02	yakuba	11	18	20190531	17	F	2	C	I
18YAK02-46	18YAK02	yakuba	11	18	20190531	18	M	2	D	I
18YAK02-46	18YAK02	yakuba	11	18	20190531	19	M	2	E	I
18YAK02-46	18YAK02	yakuba	11	18	20190531	20	M	2	F	I
18YAK02-46	18YAK02	yakuba	11	18	20190531	21	M	2	G	I
18YAK02-46	18YAK02	yakuba	11	18	20190531	22	M	2	H	I
18YAK02-46	18YAK02	yakuba	11	18	20190531	23	M	3	A	I
18YAK02-46	18YAK02	yakuba	11	18	20190531	24	M	3	B	I
18YAK02-46	18YAK02	yakuba	11	18	20190531	25	M	3	C	I
18YAK02-46	18YAK02	yakuba	11	18	20190531	26	M	3	D	I
18YAK02-46	18YAK02	yakuba	11	18	20190531	27	M	3	E	I
18YAK02-46	18YAK02	yakuba	11	18	20190531	28	M	3	F	I
18YAK02-27_1	18YAK02	yakuba	11	26	20190531	1	F	3	G	I
18YAK02-27_1	18YAK02	yakuba	11	26	20190531	2	M	3	H	I
18YAK02-27_1	18YAK02	yakuba	11	26	20190531	3	NA	4	A	I
18YAK02-27_1	18YAK02	yakuba	11	26	20190531	4	NA	4	B	I
18YAK02-27_1	18YAK02	yakuba	11	26	20190531	5	NA	4	C	I
18YAK02-27_1	18YAK02	yakuba	11	26	20190531	6	NA	4	D	I
18YAK02-27_1	18YAK02	yakuba	11	26	20190531	7	NA	4	E	I
18YAK02-27_1	18YAK02	yakuba	11	26	20190531	8	NA	4	F	I
18YAK02-27_1	18YAK02	yakuba	11	26	20190531	9	NA	4	G	I
18YAK02-27_1	18YAK02	yakuba	11	26	20190531	10	NA	4	H	I
18YAK02-27_1	18YAK02	yakuba	11	26	20190531	11	NA	5	A	I
18YAK02-27_1	18YAK02	yakuba	11	26	20190531	12	NA	5	B	I
18YAK02-27_2	18YAK02	yakuba	11	27	20190531	1	F	5	C	I
18YAK02-27_2	18YAK02	yakuba	11	27	20190531	2	M	5	D	I
18YAK02-27_2	18YAK02	yakuba	11	27	20190531	3	M	5	E	I
18YAK02-26	18YAK02	yakuba	11	29	20190531	1	F	5	F	I
18YAK02-26	18YAK02	yakuba	11	29	20190531	2	F	5	G	I
18YAK02-26	18YAK02	yakuba	11	29	20190531	3	F	5	H	I
18YAK02-26	18YAK02	yakuba	11	29	20190531	4	F	6	A	I
18YAK02-26	18YAK02	yakuba	11	29	20190531	5	F	6	B	I
18YAK02-26	18YAK02	yakuba	11	29	20190531	6	M	6	C	I
18YAK02-26	18YAK02	yakuba	11	29	20190531	7	M	6	D	I
18YAK02-26	18YAK02	yakuba	11	29	20190531	8	M	6	E	I
18YAK02-44_1	18YAK02	yakuba	11	48	20190531	1	F	6	F	I
18YAK02-44_1	18YAK02	yakuba	11	48	20190531	2	F	6	G	I
18YAK02-44_1	18YAK02	yakuba	11	48	20190531	3	F	6	H	I
18YAK02-44_1	18YAK02	yakuba	11	48	20190531	4	F	7	A	I
18YAK02-44_1	18YAK02	yakuba	11	48	20190531	5	M	7	B	I
18YAK02-44_1	18YAK02	yakuba	11	48	20190531	6	M	7	C	I
18YAK02-44_1	18YAK02	yakuba	11	48	20190531	7	M	7	D	I
18YAK02-44_1	18YAK02	yakuba	11	48	20190531	8	M	7	E	I
18YAK02-44_1	18YAK02	yakuba	11	48	20190531	9	M	7	F	I	low titer, confirmed
18YAK02-44_2	18YAK02	yakuba	11	49	20190531	1	F	7	G	I
18YAK02-44_2	18YAK02	yakuba	11	49	20190531	2	F	7	H	I
18YAK02-44_2	18YAK02	yakuba	11	49	20190531	3	F	8	A	I
18YAK02-44_2	18YAK02	yakuba	11	49	20190531	4	M	8	B	I
18YAK02-44_2	18YAK02	yakuba	11	49	20190531	5	M	8	C	I
18YAK02-44_2	18YAK02	yakuba	11	49	20190531	6	NA	8	D	I
18YAK02-44_2	18YAK02	yakuba	11	49	20190531	7	NA	8	E	I
18YAK02-43	18YAK02	yakuba	11	56	20190531	1	F	8	F	I
18YAK02-43	18YAK02	yakuba	11	56	20190531	2	F	8	G	I
18YAK02-43	18YAK02	yakuba	11	56	20190531	3	F	8	H	I
18YAK02-43	18YAK02	yakuba	11	56	20190531	4	F	9	A	I
18YAK02-43	18YAK02	yakuba	11	56	20190531	5	F	9	B	I
18YAK02-43	18YAK02	yakuba	11	56	20190531	6	F	9	C	I
18YAK02-43	18YAK02	yakuba	11	56	20190531	7	F	9	D	I
18YAK02-43	18YAK02	yakuba	11	56	20190531	8	F	9	E	I
18YAK02-43	18YAK02	yakuba	11	56	20190531	9	F	9	F	I
18YAK02-43	18YAK02	yakuba	11	56	20190531	10	F	9	G	I
18YAK02-43	18YAK02	yakuba	11	56	20190531	11	F	9	H	I
18YAK02-43	18YAK02	yakuba	11	56	20190531	12	M	10	A	I
18YAK02-43	18YAK02	yakuba	11	56	20190531	13	M	10	B	I
18YAK02-43	18YAK02	yakuba	11	56	20190531	14	M	10	C	I
18YAK02-43	18YAK02	yakuba	11	56	20190531	15	M	10	D	I
18YAK02-43	18YAK02	yakuba	11	56	20190531	16	M	10	E	I
18YAK02-43	18YAK02	yakuba	11	56	20190531	17	M	10	F	I
18YAK02-43	18YAK02	yakuba	11	56	20190531	18	M	10	G	I
18YAK02_1	18YAK02	yakuba	11	57	20190531	1	F	10	H	I
18YAK02_1	18YAK02	yakuba	11	57	20190531	2	M	11	A	I
18YAK02_2	18YAK02	yakuba	11	72	20190531	1	F	11	B	NA	failed DNA extraction
18YAK02_2	18YAK02	yakuba	11	72	20190531	2	M	11	C	I
18YAK02_2	18YAK02	yakuba	11	72	20190531	3	M	11	D	I
18YAK02_2	18YAK02	yakuba	11	72	20190531	4	M	11	E	I
18YAK02_2	18YAK02	yakuba	11	72	20190531	5	M	11	F	I
18YAK02_2	18YAK02	yakuba	11	72	20190531	6	M	11	G	I
18YAK02-24	18YAK02	yakuba	11	74	20190531	1	F	11	H	U
18YAK02-24	18YAK02	yakuba	11	74	20190531	2	F	12	A	U
18YAK02-24	18YAK02	yakuba	11	74	20190531	3	F	12	B	U	only head extracted
18YAK02-24	18YAK02	yakuba	11	74	20190531	4	M	12	C	U
18YAK02-24	18YAK02	yakuba	11	74	20190531	5	M	12	D	U
18YAK02-24	18YAK02	yakuba	11	74	20190531	6	M	12	E	U
18CAR06	18CAR06	santomea	7	27	20190607	2	F	1	A	U
18CAR06	18CAR06	santomea	7	27	20190607	3	M	1	B	U
18CAR07-23	18CAR07	santomea	7	29	20190607	1	F	1	C	I
18CAR07-23	18CAR07	santomea	7	29	20190607	2	F	1	D	I
18CAR07-23	18CAR07	santomea	7	29	20190607	3	F	1	E	I
18CAR07-23	18CAR07	santomea	7	29	20190607	4	F	1	F	I
18CAR07-23	18CAR07	santomea	7	29	20190607	5	F	1	G	I
18CAR07-23	18CAR07	santomea	7	29	20190607	6	F	1	H	I
18CAR07-23	18CAR07	santomea	7	29	20190607	7	M	2	A	I
18CAR07-23	18CAR07	santomea	7	29	20190607	8	M	2	B	I
18CAR07-23	18CAR07	santomea	7	29	20190607	9	M	2	C	I
18CAR07-23	18CAR07	santomea	7	29	20190607	10	M	2	D	I
18CAR07-23	18CAR07	santomea	7	29	20190607	11	M	2	E	I
18CAR07-23	18CAR07	santomea	7	29	20190607	12	M	2	F	I
18TRNE01-20	18TRNE01	santomea	7	31	20190607	1	F	2	G	U
18TRNE01-20	18TRNE01	santomea	7	31	20190607	2	F	2	H	U
18TRNE01-20	18TRNE01	santomea	7	31	20190607	3	F	3	A	U
18TRNE01-20	18TRNE01	santomea	7	31	20190607	4	M	3	B	U
18TRNE01-20	18TRNE01	santomea	7	31	20190607	5	M	3	C	U
18CAR01-01	18CAR01	santomea	7	32	20190607	1	F	3	D	U
18CAR01-01	18CAR01	santomea	7	32	20190607	2	F	3	E	U
18CAR01-01	18CAR01	santomea	7	32	20190607	3	F	3	F	U
18CAR01-01	18CAR01	santomea	7	32	20190607	4	F	3	G	U
18CAR01-01	18CAR01	santomea	7	32	20190607	5	F	3	H	U
18CAR01-01	18CAR01	santomea	7	32	20190607	6	F	4	A	U
18CAR01-01	18CAR01	santomea	7	32	20190607	7	M	4	B	U
18CAR01-01	18CAR01	santomea	7	32	20190607	8	M	4	C	U
18CAR01-01	18CAR01	santomea	7	32	20190607	9	M	4	D	U
18CAR01-01	18CAR01	santomea	7	32	20190607	10	M	4	E	U
18CAR01-01	18CAR01	santomea	7	32	20190607	11	M	4	F	U
18CAR01-01	18CAR01	santomea	7	32	20190607	12	M	4	G	U
18CAR01-01	18CAR01	santomea	7	32	20190607	13	M	4	H	U
18CAR09-13	18CAR09	santomea	7	33	20190607	1	F	5	A	U
18CAR09-13	18CAR09	santomea	7	33	20190607	2	F	5	B	U
18CAR09-13	18CAR09	santomea	7	33	20190607	3	F	5	C	U
18CAR09-13	18CAR09	santomea	7	33	20190607	4	F	5	D	U
18CAR09-13	18CAR09	santomea	7	33	20190607	5	M	5	E	U
18CAR09-13	18CAR09	santomea	7	33	20190607	6	M	5	F	U
18CAR09-13	18CAR09	santomea	7	33	20190607	7	M	5	G	U
18CAR10-19	18CAR10	santomea	7	34	20190607	1	F	5	H	I
18CAR10-19	18CAR10	santomea	7	34	20190607	2	F	6	A	I
18CAR10-19	18CAR10	santomea	7	34	20190607	3	F	6	B	I
18CAR10-19	18CAR10	santomea	7	34	20190607	4	F	6	C	I
18CAR10-19	18CAR10	santomea	7	34	20190607	5	F	6	D	I
18CAR10-19	18CAR10	santomea	7	34	20190607	6	F	6	E	I
18CAR10-19	18CAR10	santomea	7	34	20190607	7	M	6	F	I
18CAR10-19	18CAR10	santomea	7	34	20190607	8	M	6	G	I
18CAR10-19	18CAR10	santomea	7	34	20190607	9	M	6	H	I
18CAR10-19	18CAR10	santomea	7	34	20190607	10	M	7	A	I
18CAR10-19	18CAR10	santomea	7	34	20190607	11	M	7	B	I
18CAR10-19	18CAR10	santomea	7	34	20190607	12	M	7	C	I
18CAR10-03	18CAR10	santomea	7	36	20190607	1	F	7	D	I
18CAR10-03	18CAR10	santomea	7	36	20190607	2	F	7	E	I
18CAR10-03	18CAR10	santomea	7	36	20190607	3	F	7	F	I
18CAR10-03	18CAR10	santomea	7	36	20190607	4	F	7	G	I
18CAR10-03	18CAR10	santomea	7	36	20190607	5	M	7	H	I
18CAR10-03	18CAR10	santomea	7	36	20190607	6	M	8	A	I
18CAR10-03	18CAR10	santomea	7	36	20190607	7	M	8	B	I
18CAR10-03	18CAR10	santomea	7	36	20190607	8	M	8	C	I
18TRNE01-16	18TRNE01	santomea	7	38	20190607	1	F	8	D	I
18TRNE01-16	18TRNE01	santomea	7	38	20190607	2	F	8	E	I
18TRNE01-16	18TRNE01	santomea	7	38	20190607	3	F	8	F	I
18TRNE01-16	18TRNE01	santomea	7	38	20190607	4	F	8	G	I
18TRNE01-16	18TRNE01	santomea	7	38	20190607	5	F	8	H	I
18TRNE01-16	18TRNE01	santomea	7	38	20190607	6	F	9	A	I
18TRNE01-16	18TRNE01	santomea	7	38	20190607	7	F	9	B	I
18TRNE01-16	18TRNE01	santomea	7	38	20190607	8	F	9	C	I
18TRNE01-16	18TRNE01	santomea	7	38	20190607	9	F	9	D	I
18TRNE01-16	18TRNE01	santomea	7	38	20190607	10	F	9	E	I
18TRNE01-16	18TRNE01	santomea	7	38	20190607	11	F	9	F	I
18TRNE01-16	18TRNE01	santomea	7	38	20190607	12	M	9	G	I
18TRNE01-16	18TRNE01	santomea	7	38	20190607	13	M	9	H	I
18TRNE01-16	18TRNE01	santomea	7	38	20190607	14	M	10	A	I
18TRNE01-16	18TRNE01	santomea	7	38	20190607	15	M	10	B	I
18TRNE01-16	18TRNE01	santomea	7	38	20190607	16	M	10	C	I
18TRNE01-16	18TRNE01	santomea	7	38	20190607	17	M	10	D	I
18TRNE01-16	18TRNE01	santomea	7	38	20190607	18	M	10	E	I
18TRNE01-16	18TRNE01	santomea	7	38	20190607	19	M	10	F	I
18CAR01-02	18CAR01	santomea	7	39	20190607	1	F	10	G	I
18CAR01-02	18CAR01	santomea	7	39	20190607	2	F	10	H	I
18CAR01-02	18CAR01	santomea	7	39	20190607	3	F	11	A	U
18CAR01-02	18CAR01	santomea	7	39	20190607	4	F	11	B	I
18CAR01-02	18CAR01	santomea	7	39	20190607	5	F	11	C	I
18CAR01-02	18CAR01	santomea	7	39	20190607	6	F	11	D	I
18CAR01-02	18CAR01	santomea	7	39	20190607	7	F	11	E	I
18CAR01-02	18CAR01	santomea	7	39	20190607	8	F	11	F	I
18CAR01-02	18CAR01	santomea	7	39	20190607	9	F	11	G	I
18CAR01-02	18CAR01	santomea	7	39	20190607	10	F	11	H	I
18CAR01-02	18CAR01	santomea	7	39	20190607	11	M	12	A	U
18CAR01-02	18CAR01	santomea	7	39	20190607	12	M	12	B	I
18CAR01-02	18CAR01	santomea	7	39	20190607	13	M	12	C	I
18CAR01-02	18CAR01	santomea	7	39	20190607	14	M	12	D	I
18CAR01-02	18CAR01	santomea	7	39	20190607	15	M	12	E	U
18CAR01-02	18CAR01	santomea	7	39	20190613	16	M	1	A	U
18CAR09-07	18CAR09	santomea	7	40	20190613	1	F	1	B	I
18CAR09-07	18CAR09	santomea	7	40	20190613	2	F	1	C	I
18CAR09-07	18CAR09	santomea	7	40	20190613	3	M	1	D	I
18CAR09-07	18CAR09	santomea	7	40	20190613	4	M	1	E	I
18CAR09-07	18CAR09	santomea	7	40	20190613	5	M	1	F	I
18CAR09-07	18CAR09	santomea	7	40	20190613	6	M	1	G	I
18CAR09-07	18CAR09	santomea	7	40	20190613	7	M	1	H	I
18CAR09-07	18CAR09	santomea	7	40	20190613	8	M	2	A	I
18CAR09-07	18CAR09	santomea	7	40	20190613	9	M	2	B	I
18CAR04-01	18CAR04	santomea	7	42	20190613	1	F	2	C	I
18CAR04-01	18CAR04	santomea	7	42	20190613	2	F	2	D	I
18CAR04-01	18CAR04	santomea	7	42	20190613	3	F	2	E	I
18CAR04-01	18CAR04	santomea	7	42	20190613	4	F	2	F	I
18CAR04-01	18CAR04	santomea	7	42	20190613	5	F	2	G	I
18CAR04-01	18CAR04	santomea	7	42	20190613	6	F	2	H	I
18CAR04-01	18CAR04	santomea	7	42	20190613	7	F	3	A	I
18CAR04-01	18CAR04	santomea	7	42	20190613	8	M	3	B	I
18CAR04-01	18CAR04	santomea	7	42	20190613	9	M	3	C	I
18CAR04-01	18CAR04	santomea	7	42	20190613	10	M	3	D	I
18CAR03-06	18CAR03	santomea	7	46	20190613	1	F	3	E	U
18CAR03-06	18CAR03	santomea	7	46	20190613	2	F	3	F	U
18CAR03-06	18CAR03	santomea	7	46	20190613	3	M	3	G	I	low titer, confirmed
18CAR03-06	18CAR03	santomea	7	46	20190613	4	M	3	H	U
18CAR03-06	18CAR03	santomea	7	46	20190613	5	M	4	A	U
18CAR03-06	18CAR03	santomea	7	46	20190613	6	M	4	B	I	low titer, confirmed
18CAR04-05	18CAR04	santomea	7	60	20190613	1	F	4	C	U
18CAR04-05	18CAR04	santomea	7	60	20190613	2	F	4	D	U
18CAR04-05	18CAR04	santomea	7	60	20190613	3	F	4	E	U
18CAR04-05	18CAR04	santomea	7	60	20190613	4	F	4	F	U
18CAR04-05	18CAR04	santomea	7	60	20190613	5	F	4	G	U
18CAR04-05	18CAR04	santomea	7	60	20190613	6	F	4	H	U
18CAR04-05	18CAR04	santomea	7	60	20190613	7	M	5	A	U
18CAR04-05	18CAR04	santomea	7	60	20190613	8	M	5	B	U
18CAR04-05	18CAR04	santomea	7	60	20190613	9	M	5	C	U
18CAR04-05	18CAR04	santomea	7	60	20190613	10	M	5	D	U
18CAR07	18CAR07	santomea	7	49	20190613	1	F	5	E	I
18CAR07	18CAR07	santomea	7	49	20190613	2	F	5	F	I
18CAR07	18CAR07	santomea	7	49	20190613	3	F	5	G	I
18CAR07	18CAR07	santomea	7	49	20190613	4	F	5	H	I
18CAR07	18CAR07	santomea	7	49	20190613	5	F	6	A	I
18CAR07	18CAR07	santomea	7	49	20190613	6	F	6	B	I
18CAR07	18CAR07	santomea	7	49	20190613	7	M	6	C	I
18CAR07	18CAR07	santomea	7	49	20190613	8	M	6	D	I
18CAR05-12	18CAR05	santomea	7	63	20190613	1	F	6	E	U
18CAR05-12	18CAR05	santomea	7	63	20190613	2	F	6	F	U
18CAR05-12	18CAR05	santomea	7	63	20190613	3	F	6	G	U
18CAR05-12	18CAR05	santomea	7	63	20190613	4	F	6	H	U
18CAR05-12	18CAR05	santomea	7	63	20190613	5	F	7	A	U
18CAR05-12	18CAR05	santomea	7	63	20190613	6	M	7	B	U
18CAR05-12	18CAR05	santomea	7	63	20190613	7	M	7	C	U
18CAR05-12	18CAR05	santomea	7	63	20190613	8	M	7	D	U
18CAR09-09	18CAR09	santomea	7	66	20190613	1	F	7	E	I
18CAR09-09	18CAR09	santomea	7	66	20190613	2	F	7	F	I
18CAR09-09	18CAR09	santomea	7	66	20190613	3	F	7	G	I
18CAR09-09	18CAR09	santomea	7	66	20190613	4	F	7	H	I
18CAR09-09	18CAR09	santomea	7	66	20190613	5	F	8	A	I
18CAR09-09	18CAR09	santomea	7	66	20190613	6	F	8	B	I
18CAR09-09	18CAR09	santomea	7	66	20190613	7	F	8	C	I
18CAR09-09	18CAR09	santomea	7	66	20190613	8	M	8	D	I
18CAR09-09	18CAR09	santomea	7	66	20190613	9	M	8	E	I
18CAR09-09	18CAR09	santomea	7	66	20190613	10	M	8	F	I
18CAR09-09	18CAR09	santomea	7	66	20190613	11	M	8	G	I
18TRNE01-11	18TRNE01	santomea	7	67	20190613	1	F	8	H	I
18TRNE01-11	18TRNE01	santomea	7	67	20190613	2	F	9	A	I
18TRNE01-11	18TRNE01	santomea	7	67	20190613	3	F	9	B	I
18TRNE01-11	18TRNE01	santomea	7	67	20190613	4	F	9	C	I
18TRNE01-11	18TRNE01	santomea	7	67	20190613	5	M	9	D	I
18TRNE01-11	18TRNE01	santomea	7	67	20190613	6	M	9	E	I
18TRNE01-11	18TRNE01	santomea	7	67	20190613	7	M	9	F	I
18TRNE01-11	18TRNE01	santomea	7	67	20190613	8	M	9	G	I
18TRNE01-11	18TRNE01	santomea	7	67	20190613	9	M	9	H	I
18TRNE01-11	18TRNE01	santomea	7	67	20190613	10	M	10	A	I
18TRNE01-11	18TRNE01	santomea	7	67	20190613	11	M	10	B	I
18TRNE01-11	18TRNE01	santomea	7	67	20190613	12	M	10	C	I
18TRNE03-03	18TRNE03	santomea	7	71	20190613	1	F	10	D	I
18TRNE03-03	18TRNE03	santomea	7	71	20190613	2	F	10	E	I
18TRNE03-03	18TRNE03	santomea	7	71	20190613	3	F	10	F	I
18TRNE03-03	18TRNE03	santomea	7	71	20190613	4	M	10	G	I
18TRNE03-03	18TRNE03	santomea	7	71	20190613	5	M	10	H	I
18CAR05-11	18CAR05	santomea	7	72	20190613	1	F	11	A	I
18CAR05-11	18CAR05	santomea	7	72	20190613	2	F	11	B	I
18CAR05-11	18CAR05	santomea	7	72	20190613	3	M	11	C	I
18CAR05-11	18CAR05	santomea	7	72	20190613	4	M	11	D	I
18CAR05-11	18CAR05	santomea	7	72	20190613	5	M	11	E	I
18CAR05-11	18CAR05	santomea	7	72	20190617	6	F	1	A	I
18CAR05-11	18CAR05	santomea	7	72	20190617	7	F	1	B	I
18CAR05-11	18CAR05	santomea	7	72	20190617	8	F	1	C	I
18CAR05-11	18CAR05	santomea	7	72	20190617	9	F	1	D	I
18CAR05-11	18CAR05	santomea	7	72	20190617	10	F	1	E	I
18CAR05-11	18CAR05	santomea	7	72	20190617	11	F	1	F	I
18CAR05-11	18CAR05	santomea	7	72	20190617	12	F	1	G	I
18CAR05-11	18CAR05	santomea	7	72	20190617	13	M	1	H	I
18CAR05-11	18CAR05	santomea	7	72	20190617	14	M	2	A	I
18CAR05-11	18CAR05	santomea	7	72	20190617	15	M	2	B	I
18CAR03-04	18CAR03	santomea	7	74	20190617	1	F	2	C	U
18CAR03-04	18CAR03	santomea	7	74	20190617	2	F	2	D	U
18CAR03-04	18CAR03	santomea	7	74	20190617	3	F	2	E	U
18CAR03-04	18CAR03	santomea	7	74	20190617	4	M	2	F	U
18CAR03-04	18CAR03	santomea	7	74	20190617	5	M	2	G	U
18CAR10-11	18CAR10	santomea	8	2	20190617	1	F	2	H	U
18CAR10-11	18CAR10	santomea	8	2	20190617	2	F	3	A	U
18CAR10-11	18CAR10	santomea	8	2	20190617	3	F	3	B	U
18CAR10-11	18CAR10	santomea	8	2	20190617	4	F	3	C	U
18CAR10-11	18CAR10	santomea	8	2	20190617	5	F	3	D	U
18CAR10-11	18CAR10	santomea	8	2	20190617	6	F	3	E	U
18CAR10-11	18CAR10	santomea	8	2	20190617	7	F	3	F	U
18CAR10-11	18CAR10	santomea	8	2	20190617	8	F	3	G	U
18CAR10-11	18CAR10	santomea	8	2	20190617	9	M	3	H	U
18CAR10-11	18CAR10	santomea	8	2	20190617	10	M	4	A	U
18CAR10-11	18CAR10	santomea	8	2	20190617	11	M	4	B	U
18CAR10-11	18CAR10	santomea	8	2	20190617	12	M	4	C	U
18CAR10-11	18CAR10	santomea	8	2	20190617	13	M	4	D	U
18CAR10-11	18CAR10	santomea	8	2	20190617	14	M	4	E	U
18CAR07-16	18CAR07	santomea	8	4	20190617	1	F	4	F	I
18CAR07-16	18CAR07	santomea	8	4	20190617	2	F	4	G	I
18CAR07-16	18CAR07	santomea	8	4	20190617	3	F	4	H	I
18CAR07-16	18CAR07	santomea	8	4	20190617	4	F	5	A	I
18CAR07-16	18CAR07	santomea	8	4	20190617	5	F	5	B	I
18CAR07-16	18CAR07	santomea	8	4	20190617	6	F	5	C	I
18CAR07-16	18CAR07	santomea	8	4	20190617	7	F	5	D	I
18CAR07-16	18CAR07	santomea	8	4	20190617	8	M	5	E	I
18CAR07-16	18CAR07	santomea	8	4	20190617	9	M	5	F	I
18CAR07-16	18CAR07	santomea	8	4	20190617	10	M	5	G	I
18CAR07-16	18CAR07	santomea	8	4	20190617	11	M	5	H	I
18CAR07-16	18CAR07	santomea	8	4	20190617	12	M	6	A	I
18CAR07-16	18CAR07	santomea	8	4	20190617	13	M	6	B	I
18CAR02-05	18CAR02	santomea	8	10	20190617	1	F	6	C	I
18CAR02-05	18CAR02	santomea	8	10	20190617	2	M	6	D	I
18CAR10-05	18CAR10	santomea	8	16	20190617	1	F	6	E	U
18CAR10-05	18CAR10	santomea	8	16	20190617	2	F	6	F	U
18CAR10-05	18CAR10	santomea	8	16	20190617	3	F	6	G	U
18CAR10-05	18CAR10	santomea	8	16	20190617	4	F	6	H	U
18CAR10-05	18CAR10	santomea	8	16	20190617	5	F	7	A	U
18CAR10-05	18CAR10	santomea	8	16	20190617	6	M	7	B	U
18CAR10-05	18CAR10	santomea	8	16	20190617	7	M	7	C	U
18CAR10-05	18CAR10	santomea	8	16	20190617	8	M	7	D	U
18CAR10-05	18CAR10	santomea	8	16	20190617	9	M	7	E	U
18CAR10-05	18CAR10	santomea	8	16	20190617	10	M	7	F	U
18CAR10-05	18CAR10	santomea	8	16	20190617	11	M	7	G	U
18CAR10-05	18CAR10	santomea	8	16	20190617	12	M	7	H	U
18CAR10-05	18CAR10	santomea	8	16	20190617	13	M	8	A	U
18TRNE02-05	18TRNE02	santomea	8	20	20190617	1	F	8	B	I
18TRNE02-05	18TRNE02	santomea	8	20	20190617	2	F	8	C	I
18TRNE02-05	18TRNE02	santomea	8	20	20190617	3	F	8	D	I
18TRNE02-05	18TRNE02	santomea	8	20	20190617	4	M	8	E	I
18TRNE02-05	18TRNE02	santomea	8	20	20190617	5	M	8	F	I
18TRNE02-05	18TRNE02	santomea	8	20	20190617	6	M	8	G	I
18CAR10-16	18CAR10	santomea	8	42	20190617	1	F	8	H	I
18CAR10-16	18CAR10	santomea	8	42	20190617	2	F	9	A	I
18CAR10-16	18CAR10	santomea	8	42	20190617	3	F	9	B	I
18CAR10-16	18CAR10	santomea	8	42	20190617	4	M	9	C	I
18CAR09-05	18CAR09	santomea	8	70	20190617	1	F	9	D	U
18CAR09-05	18CAR09	santomea	8	70	20190617	2	F	9	E	U
18CAR09-05	18CAR09	santomea	8	70	20190617	3	F	9	F	U
18CAR09-05	18CAR09	santomea	8	70	20190617	4	M	9	G	U
18CAR09-05	18CAR09	santomea	8	70	20190617	5	M	9	H	U
18CAR09-05	18CAR09	santomea	8	70	20190617	6	M	10	A	U
18CAR09-05	18CAR09	santomea	8	70	20190617	7	M	10	B	U
18CAR09-05	18CAR09	santomea	8	70	20190617	8	M	10	C	U
18CAR09-10	18CAR09	santomea	8	71	20190617	1	F	10	D	U
18CAR09-10	18CAR09	santomea	8	71	20190617	2	F	10	E	U
18CAR09-10	18CAR09	santomea	8	71	20190617	3	M	10	F	U
18CAR09-10	18CAR09	santomea	8	71	20190617	4	M	10	G	U
18CAR09-10	18CAR09	santomea	8	71	20190617	5	M	10	H	U
18CAR09-10	18CAR09	santomea	8	71	20190617	6	M	11	A	U
18CAR07-04	18CAR07	santomea	8	74	20190617	1	F	11	B	I
18CAR07-04	18CAR07	santomea	8	74	20190617	2	F	11	C	I
18CAR07-04	18CAR07	santomea	8	74	20190617	3	F	11	D	I
18CAR07-04	18CAR07	santomea	8	74	20190617	4	F	11	E	I
18CAR07-04	18CAR07	santomea	8	74	20190617	5	F	11	F	I
18CAR07-04	18CAR07	santomea	8	74	20190617	6	F	11	G	I
18CAR07-04	18CAR07	santomea	8	74	20190617	7	M	11	H	I
18CAR07-04	18CAR07	santomea	8	74	20190617	8	M	12	A	I
18CAR07-04	18CAR07	santomea	8	74	20190617	9	M	12	B	I
18CAR10-18	18CAR10	santomea	8	76	20190617	1	F	12	C	I
18CAR10-18	18CAR10	santomea	8	76	20190617	2	M	12	D	I
18CAR10-18	18CAR10	santomea	8	76	20190617	3	M	12	E	I
18CAR10-18	18CAR10	santomea	8	76	20190708	4	F	1	A	I
18CAR10-18	18CAR10	santomea	8	76	20190708	5	F	1	B	I
18CAR10-18	18CAR10	santomea	8	76	20190708	6	M	1	C	I
18CAR10-18	18CAR10	santomea	8	76	20190708	7	M	1	D	I
18CAR10-18	18CAR10	santomea	8	76	20190708	8	M	1	E	I
18CAR10-18	18CAR10	santomea	8	76	20190708	9	M	1	F	I
18CAR05-05	18CAR05	santomea	8	77	20190708	1	F	1	G	U
18CAR05-05	18CAR05	santomea	8	77	20190708	2	F	1	H	U
18CAR05-05	18CAR05	santomea	8	77	20190708	3	F	2	A	U
18CAR05-05	18CAR05	santomea	8	77	20190708	4	F	2	B	U
18CAR05-05	18CAR05	santomea	8	77	20190708	5	F	2	C	U
18CAR05-05	18CAR05	santomea	8	77	20190708	6	F	2	D	U
18CAR05-05	18CAR05	santomea	8	77	20190708	7	F	2	E	U
18CAR05-05	18CAR05	santomea	8	77	20190708	8	F	2	F	U
18CAR05-05	18CAR05	santomea	8	77	20190708	9	M	2	G	I	low titer, confirmed
18CAR05-05	18CAR05	santomea	8	77	20190708	10	M	2	H	U
18CAR05-05	18CAR05	santomea	8	77	20190708	11	M	3	A	U
18CAR05-05	18CAR05	santomea	8	77	20190708	12	M	3	B	I	low titer, confirmed
18CAR05-05	18CAR05	santomea	8	77	20190708	13	M	3	C	U
18CAR05-05	18CAR05	santomea	8	77	20190708	14	M	3	D	U
18CAR05-05	18CAR05	santomea	8	77	20190708	15	M	3	E	U
18CAR05-05	18CAR05	santomea	8	77	20190708	16	M	3	F	U
18CAR05-05	18CAR05	santomea	8	77	20190708	17	M	3	G	I	low titer, confirmed
18CAR05-13	18CAR05	santomea	8	78	20190708	1	F	3	H	I
18CAR05-13	18CAR05	santomea	8	78	20190708	2	F	4	A	I
18CAR05-13	18CAR05	santomea	8	78	20190708	3	F	4	B	I
18CAR05-13	18CAR05	santomea	8	78	20190708	4	F	4	C	I
18CAR05-13	18CAR05	santomea	8	78	20190708	5	M	4	D	I
18CAR05-13	18CAR05	santomea	8	78	20190708	6	M	4	E	I
18CAR05-13	18CAR05	santomea	8	78	20190708	7	M	4	F	I
18CAR07-25	18CAR07	santomea	9	1	20190708	1	F	4	G	I
18CAR07-25	18CAR07	santomea	9	1	20190708	2	F	4	H	I
18CAR07-25	18CAR07	santomea	9	1	20190708	3	M	5	A	I
18TRNE02-11	18TRNE02	santomea	9	3	20190708	1	F	5	B	I
18TRNE02-11	18TRNE02	santomea	9	3	20190708	2	F	5	C	I
18TRNE02-11	18TRNE02	santomea	9	3	20190708	3	F	5	D	I
18TRNE02-11	18TRNE02	santomea	9	3	20190708	4	F	5	E	I
18TRNE02-11	18TRNE02	santomea	9	3	20190708	5	F	5	F	I
18TRNE02-11	18TRNE02	santomea	9	3	20190708	6	F	5	G	I
18TRNE02-11	18TRNE02	santomea	9	3	20190708	7	F	5	H	I
18TRNE02-11	18TRNE02	santomea	9	3	20190708	8	F	6	A	I
18TRNE02-11	18TRNE02	santomea	9	3	20190708	9	F	6	B	I
18TRNE02-11	18TRNE02	santomea	9	3	20190708	10	F	6	C	I
18TRNE02-11	18TRNE02	santomea	9	3	20190708	11	F	6	D	I
18TRNE02-11	18TRNE02	santomea	9	3	20190708	12	F	6	E	I
18TRNE02-11	18TRNE02	santomea	9	3	20190708	13	F	6	F	I
18TRNE02-11	18TRNE02	santomea	9	3	20190708	14	F	6	G	I
18TRNE02-11	18TRNE02	santomea	9	3	20190708	15	F	6	H	I
18TRNE02-11	18TRNE02	santomea	9	3	20190708	16	M	7	A	I
18TRNE02-11	18TRNE02	santomea	9	3	20190708	17	M	7	B	I
18TRNE02-11	18TRNE02	santomea	9	3	20190708	18	M	7	C	I
18TRNE02-11	18TRNE02	santomea	9	3	20190708	19	M	7	D	I
18TRNE02-11	18TRNE02	santomea	9	3	20190708	20	M	7	E	I
18TRNE02-11	18TRNE02	santomea	9	3	20190708	21	M	7	F	I
18TRNE02-11	18TRNE02	santomea	9	3	20190708	22	M	7	G	I
18TRNE02-11	18TRNE02	santomea	9	3	20190708	23	M	7	H	I
18TRNE02-11	18TRNE02	santomea	9	3	20190708	24	M	8	A	I
18TRNE02-11	18TRNE02	santomea	9	3	20190708	25	M	8	B	I
18TRNE02-11	18TRNE02	santomea	9	3	20190708	26	M	8	C	I
18TRNE02-11	18TRNE02	santomea	9	3	20190708	27	M	8	D	I
18TRNE02-11	18TRNE02	santomea	9	3	20190708	28	M	8	E	I
18TRNE01-07	18TRNE01	santomea	9	4	20190708	1	F	8	F	I
18TRNE01-07	18TRNE01	santomea	9	4	20190708	2	F	8	G	I
18TRNE01-07	18TRNE01	santomea	9	4	20190708	3	F	8	H	I
18TRNE01-07	18TRNE01	santomea	9	4	20190708	4	F	9	A	I
18TRNE01-07	18TRNE01	santomea	9	4	20190708	5	F	9	B	I
18TRNE01-07	18TRNE01	santomea	9	4	20190708	6	F	9	C	I
18TRNE01-07	18TRNE01	santomea	9	4	20190708	7	F	9	D	I
18TRNE01-07	18TRNE01	santomea	9	4	20190708	8	F	9	E	I
18TRNE01-07	18TRNE01	santomea	9	4	20190708	9	F	9	F	I
18TRNE01-07	18TRNE01	santomea	9	4	20190708	10	F	9	G	I
18TRNE01-07	18TRNE01	santomea	9	4	20190708	11	F	9	H	I
18TRNE01-07	18TRNE01	santomea	9	4	20190708	12	F	10	A	I
18TRNE01-07	18TRNE01	santomea	9	4	20190708	13	F	10	B	I
18TRNE01-07	18TRNE01	santomea	9	4	20190708	14	F	10	C	I
18TRNE01-07	18TRNE01	santomea	9	4	20190708	15	F	10	D	I
18TRNE01-07	18TRNE01	santomea	9	4	20190708	16	F	10	E	I
18TRNE01-07	18TRNE01	santomea	9	4	20190708	17	M	10	F	I
18TRNE01-07	18TRNE01	santomea	9	4	20190708	18	M	10	G	I
18TRNE01-07	18TRNE01	santomea	9	4	20190708	19	M	10	H	I
18TRNE01-07	18TRNE01	santomea	9	4	20190708	20	M	11	A	I
18TRNE01-07	18TRNE01	santomea	9	4	20190708	21	M	11	B	I
18TRNE01-07	18TRNE01	santomea	9	4	20190708	22	M	11	C	I
18TRNE01-07	18TRNE01	santomea	9	4	20190708	23	M	11	D	I
18TRNE01-07	18TRNE01	santomea	9	4	20190708	24	M	11	E	I
18TRNE01-07	18TRNE01	santomea	9	4	20190708	25	M	11	F	I
18TRNE01-07	18TRNE01	santomea	9	4	20190708	26	M	11	G	I
18TRNE01-07	18TRNE01	santomea	9	4	20190708	27	M	11	H	I
18TRNE01-07	18TRNE01	santomea	9	4	20190710	28	M	1	A	I
18TRNE01-07	18TRNE01	santomea	9	4	20190710	29	M	1	B	I
18TRNE01-07	18TRNE01	santomea	9	4	20190710	30	M	1	C	I
18TRNE01-07	18TRNE01	santomea	9	4	20190710	31	M	1	D	I
18TRNE01-07	18TRNE01	santomea	9	4	20190710	32	M	1	E	I
18CAR10-08	18CAR10	santomea	9	5	20190710	1	F	1	F	I
18CAR10-08	18CAR10	santomea	9	5	20190710	2	F	1	G	I
18CAR10-08	18CAR10	santomea	9	5	20190710	3	F	1	H	I
18CAR10-08	18CAR10	santomea	9	5	20190710	4	M	2	A	I
18TRNE02-10	18TRNE02	santomea	9	6	20190710	1	F	2	B	I
18TRNE02-10	18TRNE02	santomea	9	6	20190710	2	F	2	C	I
18TRNE02-10	18TRNE02	santomea	9	6	20190710	3	F	2	D	I
18TRNE02-10	18TRNE02	santomea	9	6	20190710	4	M	2	E	I
18TRNE02-10	18TRNE02	santomea	9	6	20190710	5	M	2	F	I
18TRNE02-10	18TRNE02	santomea	9	6	20190710	6	M	2	G	I
18CAR10-14	18CAR10	santomea	9	7	20190710	1	F	2	H	U
18CAR10-14	18CAR10	santomea	9	7	20190710	2	F	3	A	U
18CAR10-14	18CAR10	santomea	9	7	20190710	3	F	3	B	U
18CAR10-14	18CAR10	santomea	9	7	20190710	4	F	3	C	U
18CAR10-14	18CAR10	santomea	9	7	20190710	5	F	3	D	U
18CAR10-14	18CAR10	santomea	9	7	20190710	6	F	3	E	U
18CAR10-14	18CAR10	santomea	9	7	20190710	7	M	3	F	U
18CAR10-14	18CAR10	santomea	9	7	20190710	8	M	3	G	U
18CAR10-14	18CAR10	santomea	9	7	20190710	9	M	3	H	U
18CAR10-14	18CAR10	santomea	9	7	20190710	10	M	4	A	U
18CAR10-14	18CAR10	santomea	9	7	20190710	11	M	4	B	U
18CAR10-04	18CAR10	santomea	9	8	20190710	1	F	4	C	I
18CAR10-04	18CAR10	santomea	9	8	20190710	2	M	4	D	I
18CAR10-04	18CAR10	santomea	9	8	20190710	3	M	4	E	I
18CAR10-04	18CAR10	santomea	9	8	20190710	4	M	4	F	I
18CAR10-04	18CAR10	santomea	9	8	20190710	5	M	4	G	I
18CAR10-04	18CAR10	santomea	9	8	20190710	6	M	4	H	I
18CAR10-04	18CAR10	santomea	9	8	20190710	7	M	5	A	I
18CAR05-08	18CAR05	santomea	9	11	20190710	1	F	5	B	I
18CAR05-08	18CAR05	santomea	9	11	20190710	2	F	5	C	I
18CAR05-08	18CAR05	santomea	9	11	20190710	3	F	5	D	I
18CAR05-08	18CAR05	santomea	9	11	20190710	4	F	5	E	I
18CAR05-08	18CAR05	santomea	9	11	20190710	5	F	5	F	I
18CAR05-08	18CAR05	santomea	9	11	20190710	6	F	5	G	I
18CAR05-08	18CAR05	santomea	9	11	20190710	7	F	5	H	I
18CAR05-08	18CAR05	santomea	9	11	20190710	8	F	6	A	I
18CAR05-08	18CAR05	santomea	9	11	20190710	9	M	6	B	I
18CAR05-08	18CAR05	santomea	9	11	20190710	10	M	6	C	I
18CAR05-06	18CAR05	santomea	9	12	20190710	1	F	6	D	I
18CAR05-06	18CAR05	santomea	9	12	20190710	2	F	6	E	I
18CAR05-06	18CAR05	santomea	9	12	20190710	3	F	6	F	I
18CAR05-06	18CAR05	santomea	9	12	20190710	4	F	6	G	I
18CAR05-06	18CAR05	santomea	9	12	20190710	5	F	6	H	I
18CAR05-06	18CAR05	santomea	9	12	20190710	6	M	7	A	I
18CAR05-06	18CAR05	santomea	9	12	20190710	7	M	7	B	I
18CAR05-03	18CAR05	santomea	9	14	20190710	1	F	7	C	I
18CAR05-03	18CAR05	santomea	9	14	20190710	2	F	7	D	I
18CAR05-03	18CAR05	santomea	9	14	20190710	3	F	7	E	I
18CAR05-03	18CAR05	santomea	9	14	20190710	4	F	7	F	I
18CAR05-03	18CAR05	santomea	9	14	20190710	5	F	7	G	I
18CAR05-03	18CAR05	santomea	9	14	20190710	6	M	7	H	I
18CAR05-03	18CAR05	santomea	9	14	20190710	7	M	8	A	I
18CAR05-03	18CAR05	santomea	9	14	20190710	8	M	8	B	I
18TRNE01	18TRNE01	santomea	9	15	20190710	1	F	8	C	U
18TRNE01	18TRNE01	santomea	9	15	20190710	2	F	8	D	U
18TRNE01	18TRNE01	santomea	9	15	20190710	3	F	8	E	U
18TRNE01	18TRNE01	santomea	9	15	20190710	4	M	8	F	I	low titer, confirmed
18TRNE01	18TRNE01	santomea	9	15	20190710	5	M	8	G	I	low titer, confirmed
18TRNE01	18TRNE01	santomea	9	15	20190710	6	M	8	H	I	low titer, confirmed
18TRNE01	18TRNE01	santomea	9	15	20190710	7	M	9	A	U
18TRNE01	18TRNE01	santomea	9	15	20190710	8	M	9	B	U
18CAR10-15	18CAR10	santomea	9	16	20190710	1	M	9	C	U
18CAR10-15	18CAR10	santomea	9	16	20190710	2	M	9	D	U
18CAR10-16_2	18CAR10	santomea	9	17	20190710	1	M	9	E	I
18CAR10-16_2	18CAR10	santomea	9	17	20190710	2	M	9	F	I
18CAR07-22	18CAR07	santomea	9	18	20190710	1	F	9	G	I
18CAR07-22	18CAR07	santomea	9	18	20190710	2	F	9	H	I
18CAR07-22	18CAR07	santomea	9	18	20190710	3	F	10	A	I
18CAR07-22	18CAR07	santomea	9	18	20190710	4	F	10	B	I
18CAR07-22	18CAR07	santomea	9	18	20190710	5	F	10	C	I
18CAR07-22	18CAR07	santomea	9	18	20190710	6	F	10	D	I
18CAR07-22	18CAR07	santomea	9	18	20190710	7	F	10	E	I
18CAR07-22	18CAR07	santomea	9	18	20190710	8	F	10	F	I
18CAR07-22	18CAR07	santomea	9	18	20190710	9	F	10	G	I
18CAR07-22	18CAR07	santomea	9	18	20190710	10	M	10	H	I
18CAR07-22	18CAR07	santomea	9	18	20190710	11	M	11	A	I
18CAR07-22	18CAR07	santomea	9	18	20190710	12	M	11	B	I
18CAR07-22	18CAR07	santomea	9	18	20190710	13	M	11	C	I
18CAR07-22	18CAR07	santomea	9	18	20190710	14	M	11	D	I
18CAR07-22	18CAR07	santomea	9	18	20190710	15	M	11	E	I
18CAR07-22	18CAR07	santomea	9	18	20190710	16	M	11	F	I
18CAR07-22	18CAR07	santomea	9	18	20190710	17	M	11	G	I
18CAR07-22	18CAR07	santomea	9	18	20190710	18	M	11	H	I
18CAR07-22	18CAR07	santomea	9	18	20190710	19	M	12	A	I
18CAR04-02	18CAR04	santomea	9	19	20190710	1	F	12	B	U
18CAR04-02	18CAR04	santomea	9	19	20190710	2	M	12	C	U
18CAR04-02	18CAR04	santomea	9	19	20190710	3	M	12	D	U
18CAR09	18CAR09	santomea	9	20	20190710	1	F	12	E	I
18CAR09	18CAR09	santomea	9	20	20190712	2	F	1	A	I
18CAR09	18CAR09	santomea	9	20	20190712	3	M	1	B	I
18CAR04-03	18CAR04	santomea	9	72	20190712	1	F	1	C	I
18CAR04-03	18CAR04	santomea	9	72	20190712	2	F	1	D	I
18CAR04-03	18CAR04	santomea	9	72	20190712	3	F	1	E	I
18CAR04-03	18CAR04	santomea	9	72	20190712	4	F	1	F	I
18CAR04-03	18CAR04	santomea	9	72	20190712	5	F	1	G	I
18CAR04-03	18CAR04	santomea	9	72	20190712	6	F	1	H	I
18CAR04-03	18CAR04	santomea	9	72	20190712	7	F	2	A	I
18CAR04-03	18CAR04	santomea	9	72	20190712	8	M	2	B	I
18CAR04-03	18CAR04	santomea	9	72	20190712	9	M	2	C	I
18TRNE02-02	18TRNE02	santomea	10	2	20190712	1	F	2	D	I
18TRNE02-02	18TRNE02	santomea	10	2	20190712	2	F	2	E	I
18TRNE02-02	18TRNE02	santomea	10	2	20190712	3	M	2	F	I
18TRNE01-06	18TRNE01	santomea	10	43	20190712	1	F	2	G	U
18TRNE01-06	18TRNE01	santomea	10	43	20190712	2	F	2	H	U
18TRNE01-06	18TRNE01	santomea	10	43	20190712	3	F	3	A	U
18TRNE01-06	18TRNE01	santomea	10	43	20190712	4	F	3	B	U
18TRNE01-06	18TRNE01	santomea	10	43	20190712	5	F	3	C	U
18TRNE01-06	18TRNE01	santomea	10	43	20190712	6	M	3	D	I	low titer, confirmed
18TRNE01-06	18TRNE01	santomea	10	43	20190712	7	M	3	E	U
18TRNE01-06	18TRNE01	santomea	10	43	20190712	8	M	3	F	U
18TRNE01-06	18TRNE01	santomea	10	43	20190712	9	M	3	G	U
18TRNE01-06	18TRNE01	santomea	10	43	20190712	10	M	3	H	U
18TRNE03-01	18TRNE03	santomea	10	46	20190712	1	F	4	A	I
18TRNE03-01	18TRNE03	santomea	10	46	20190712	2	F	4	B	I
18TRNE03-01	18TRNE03	santomea	10	46	20190712	3	F	4	C	I
18TRNE03-01	18TRNE03	santomea	10	46	20190712	4	F	4	D	I
18TRNE03-01	18TRNE03	santomea	10	46	20190712	5	F	4	E	I
18TRNE03-01	18TRNE03	santomea	10	46	20190712	6	F	4	F	I
18TRNE03-01	18TRNE03	santomea	10	46	20190712	7	F	4	G	I
18TRNE03-01	18TRNE03	santomea	10	46	20190712	8	F	4	H	I
18TRNE03-01	18TRNE03	santomea	10	46	20190712	9	M	5	A	I
18TRNE03-01	18TRNE03	santomea	10	46	20190712	10	M	5	B	I
18TRNE03-01	18TRNE03	santomea	10	46	20190712	11	M	5	C	I
18TRNE03-01	18TRNE03	santomea	10	46	20190712	12	M	5	D	U
18TRNE03-01	18TRNE03	santomea	10	46	20190712	13	M	5	E	I
18TRNE03-01	18TRNE03	santomea	10	46	20190712	14	M	5	F	I
18TRNE03-01	18TRNE03	santomea	10	46	20190712	15	M	5	G	I
18CAR05-02	18CAR05	santomea	10	75	20190712	1	F	5	H	I
18CAR05-02	18CAR05	santomea	10	75	20190712	2	F	6	A	I
18CAR05-02	18CAR05	santomea	10	75	20190712	3	F	6	B	I
18CAR05-02	18CAR05	santomea	10	75	20190712	4	F	6	C	I
18CAR05-02	18CAR05	santomea	10	75	20190712	5	F	6	D	I
18CAR05-02	18CAR05	santomea	10	75	20190712	6	F	6	E	I
18CAR05-02	18CAR05	santomea	10	75	20190712	7	F	6	F	I
18CAR05-02	18CAR05	santomea	10	75	20190712	8	F	6	G	I
18CAR05-02	18CAR05	santomea	10	75	20190712	9	F	6	H	I
18CAR05-02	18CAR05	santomea	10	75	20190712	10	M	7	A	I
18CAR05-02	18CAR05	santomea	10	75	20190712	11	M	7	B	I
18CAR05-02	18CAR05	santomea	10	75	20190712	12	M	7	C	I
18CAR05-02	18CAR05	santomea	10	75	20190712	13	M	7	D	I
18CAR05-02	18CAR05	santomea	10	75	20190712	14	M	7	E	I
18CAR05-02	18CAR05	santomea	10	75	20190712	15	M	7	F	I
18TRNE01-08	18TRNE01	santomea	11	22	20190712	1	F	7	G	I
18TRNE01-08	18TRNE01	santomea	11	22	20190712	2	F	7	H	I
18TRNE01-08	18TRNE01	santomea	11	22	20190712	3	F	8	A	U
18TRNE01-08	18TRNE01	santomea	11	22	20190712	4	F	8	B	I
18TRNE01-08	18TRNE01	santomea	11	22	20190712	5	M	8	C	U
18TRNE01-08	18TRNE01	santomea	11	22	20190712	6	M	8	D	U
18TRNE01-08	18TRNE01	santomea	11	22	20190712	7	M	8	E	U
18TRNE01-08	18TRNE01	santomea	11	22	20190712	8	M	8	F	U
18TRNE02-09	18TRNE02	santomea	11	24	20190712	1	F	8	G	I
18TRNE02-09	18TRNE02	santomea	11	24	20190712	2	F	8	H	I
18TRNE02-09	18TRNE02	santomea	11	24	20190712	3	F	9	A	I
18TRNE02-09	18TRNE02	santomea	11	24	20190712	4	F	9	B	I
18TRNE02-09	18TRNE02	santomea	11	24	20190712	5	F	9	C	I
18TRNE02-09	18TRNE02	santomea	11	24	20190712	6	F	9	D	I
18TRNE02-09	18TRNE02	santomea	11	24	20190712	7	F	9	E	I
18TRNE02-09	18TRNE02	santomea	11	24	20190712	8	F	9	F	I
18TRNE02-09	18TRNE02	santomea	11	24	20190712	9	M	9	G	I
18TRNE02-09	18TRNE02	santomea	11	24	20190712	10	M	9	H	I
18TRNE02-09	18TRNE02	santomea	11	24	20190712	11	M	10	A	I
18TRNE02-09	18TRNE02	santomea	11	24	20190712	12	M	10	B	I
18TRNE02-09	18TRNE02	santomea	11	24	20190712	13	M	10	C	I
18TRNE02-06	18TRNE02	santomea	11	31	20190712	1	F	10	D	I
18TRNE02-06	18TRNE02	santomea	11	31	20190712	2	F	10	E	I
18TRNE02-06	18TRNE02	santomea	11	31	20190712	3	F	10	F	I
18TRNE02-06	18TRNE02	santomea	11	31	20190712	4	F	10	G	I
18TRNE02-06	18TRNE02	santomea	11	31	20190712	5	F	10	H	I
18TRNE02-06	18TRNE02	santomea	11	31	20190712	6	F	11	A	I
18TRNE02-06	18TRNE02	santomea	11	31	20190712	7	F	11	B	I
18TRNE02-06	18TRNE02	santomea	11	31	20190712	8	F	11	C	I
18TRNE02-06	18TRNE02	santomea	11	31	20190712	9	F	11	D	I
18TRNE02-06	18TRNE02	santomea	11	31	20190712	10	F	11	E	I
18TRNE02-06	18TRNE02	santomea	11	31	20190712	11	F	11	F	I
18TRNE02-06	18TRNE02	santomea	11	31	20190712	12	F	11	G	I
18TRNE02-06	18TRNE02	santomea	11	31	20190712	13	F	11	H	I
18TRNE02-06	18TRNE02	santomea	11	31	20190712	14	F	12	A	I
18TRNE02-06	18TRNE02	santomea	11	31	20190712	15	F	12	B	I
18TRNE02-06	18TRNE02	santomea	11	31	20190712	16	M	12	C	I
18TRNE02-06	18TRNE02	santomea	11	31	20190712	17	M	12	D	I
18TRNE02-06	18TRNE02	santomea	11	31	20190712	18	M	12	E	I
18TRNE02-06	18TRNE02	santomea	11	31	20190721	19	M	1	A	I
18CAR05-10	18CAR05	santomea	11	34	20190721	1	F	1	B	I
18CAR05-10	18CAR05	santomea	11	34	20190721	2	F	1	C	I
18CAR05-10	18CAR05	santomea	11	34	20190721	3	F	1	D	I
18CAR05-10	18CAR05	santomea	11	34	20190721	4	F	1	E	I
18CAR05-10	18CAR05	santomea	11	34	20190721	5	F	1	F	I
18CAR05-10	18CAR05	santomea	11	34	20190721	6	F	1	G	U
18CAR05-10	18CAR05	santomea	11	34	20190721	7	F	1	H	I
18CAR05-10	18CAR05	santomea	11	34	20190721	8	F	2	A	I
18CAR05-10	18CAR05	santomea	11	34	20190721	9	F	2	B	I
18CAR05-10	18CAR05	santomea	11	34	20190721	10	F	2	C	I
18CAR05-10	18CAR05	santomea	11	34	20190721	11	F	2	D	I
18CAR05-10	18CAR05	santomea	11	34	20190721	12	F	2	E	I
18CAR05-10	18CAR05	santomea	11	34	20190721	13	F	2	F	I
18CAR05-10	18CAR05	santomea	11	34	20190721	14	F	2	G	I
18CAR05-10	18CAR05	santomea	11	34	20190721	15	F	2	H	I
18CAR05-10	18CAR05	santomea	11	34	20190721	16	F	3	A	U
18CAR05-10	18CAR05	santomea	11	34	20190721	17	F	3	B	I
18CAR05-10	18CAR05	santomea	11	34	20190721	18	M	3	C	I
18CAR05-10	18CAR05	santomea	11	34	20190721	19	M	3	D	I
18CAR05-10	18CAR05	santomea	11	34	20190721	20	M	3	E	I
18CAR05-10	18CAR05	santomea	11	34	20190721	21	M	3	F	I
18CAR05-10	18CAR05	santomea	11	34	20190721	22	M	3	G	I
18CAR05-10	18CAR05	santomea	11	34	20190721	23	M	3	H	I
18CAR05-10	18CAR05	santomea	11	34	20190721	24	M	4	A	I
18CAR05-10	18CAR05	santomea	11	34	20190721	25	M	4	B	I
18CAR05-10	18CAR05	santomea	11	34	20190721	26	M	4	C	I
18CAR05-10	18CAR05	santomea	11	34	20190721	27	M	4	D	I
18CAR05-10	18CAR05	santomea	11	34	20190721	28	M	4	E	I
18CAR05-10	18CAR05	santomea	11	34	20190721	29	NA	4	F	I
18TRNE02-08	18TRNE02	santomea	11	36	20190721	1	F	4	G	I
18TRNE02-08	18TRNE02	santomea	11	36	20190721	2	F	4	H	I
18TRNE02-08	18TRNE02	santomea	11	36	20190721	3	F	5	A	I
18TRNE02-08	18TRNE02	santomea	11	36	20190721	4	F	5	B	I
18TRNE02-08	18TRNE02	santomea	11	36	20190721	5	M	5	C	I
18TRNE03-02	18TRNE03	santomea	11	37	20190721	1	F	5	D	I
18TRNE03-02	18TRNE03	santomea	11	37	20190721	2	F	5	E	I
18TRNE03-02	18TRNE03	santomea	11	37	20190721	3	F	5	F	I
18TRNE03-02	18TRNE03	santomea	11	37	20190721	4	F	5	G	I
18TRNE03-02	18TRNE03	santomea	11	37	20190721	5	F	5	H	I
18TRNE03-02	18TRNE03	santomea	11	37	20190721	6	M	6	A	I
18TRNE03-02	18TRNE03	santomea	11	37	20190721	7	M	6	B	I
18TRNE03-02	18TRNE03	santomea	11	37	20190721	8	M	6	C	I
18TRNE03-02	18TRNE03	santomea	11	37	20190721	9	M	6	D	I
18CAR05-07	18CAR05	santomea	11	38	20190721	1	F	6	E	I
18CAR05-07	18CAR05	santomea	11	38	20190721	2	F	6	F	I
18CAR05-07	18CAR05	santomea	11	38	20190721	3	F	6	G	I
18CAR05-07	18CAR05	santomea	11	38	20190721	4	M	6	H	I
18CAR05-07	18CAR05	santomea	11	38	20190721	5	M	7	A	I
18TRNE03-02	18TRNE03	santomea	11	37	20190721	10	M	7	B	I
18CAR05-07	18CAR05	santomea	11	38	20190721	6	M	7	C	I
18CAR05-07	18CAR05	santomea	11	38	20190721	7	M	7	D	I
18CAR05-07	18CAR05	santomea	11	38	20190721	8	M	7	E	I
18CAR05-07	18CAR05	santomea	11	38	20190721	9	M	7	F	I
18CAR05-07	18CAR05	santomea	11	38	20190721	10	M	7	G	I
18TRNE01-05	18TRNE01	santomea	11	39	20190721	1	F	7	H	I
18TRNE01-05	18TRNE01	santomea	11	39	20190721	2	F	8	A	I
18TRNE01-05	18TRNE01	santomea	11	39	20190721	3	F	8	B	I
18TRNE01-05	18TRNE01	santomea	11	39	20190721	4	F	8	C	I
18TRNE01-05	18TRNE01	santomea	11	39	20190721	5	F	8	D	I
18TRNE01-05	18TRNE01	santomea	11	39	20190721	6	F	8	E	I
18TRNE01-05	18TRNE01	santomea	11	39	20190721	7	F	8	F	I
18TRNE01-05	18TRNE01	santomea	11	39	20190721	8	F	8	G	I
18TRNE01-05	18TRNE01	santomea	11	39	20190721	9	F	8	H	I
18TRNE01-05	18TRNE01	santomea	11	39	20190721	10	M	9	A	I
18TRNE01-05	18TRNE01	santomea	11	39	20190721	11	M	9	B	I
18CAR01-03	18CAR01	santomea	11	45	20190721	1	F	9	C	I
18CAR01-03	18CAR01	santomea	11	45	20190721	2	F	9	D	I
18CAR01-03	18CAR01	santomea	11	45	20190721	3	F	9	E	I
18CAR01-03	18CAR01	santomea	11	45	20190721	4	F	9	F	I
18CAR01-03	18CAR01	santomea	11	45	20190721	5	F	9	G	I
18CAR01-03	18CAR01	santomea	11	45	20190721	6	F	9	H	I
18CAR01-03	18CAR01	santomea	11	45	20190721	7	F	10	A	I
18CAR01-03	18CAR01	santomea	11	45	20190721	8	M	10	B	I
18CAR01-03	18CAR01	santomea	11	45	20190721	9	M	10	C	I
18CAR01-03	18CAR01	santomea	11	45	20190721	10	M	10	D	I
18CAR01-03	18CAR01	santomea	11	45	20190721	11	M	10	E	I
18CAR01-03	18CAR01	santomea	11	45	20190721	12	M	10	F	I
18CAR01-03	18CAR01	santomea	11	45	20190721	13	M	10	G	I
18CAR01-03	18CAR01	santomea	11	45	20190721	14	M	10	H	I
18TRNE03-05	18TRNE03	santomea	11	66	20190721	1	F	11	A	U
18TRNE03-05	18TRNE03	santomea	11	66	20190721	2	F	11	B	U
18TRNE03-05	18TRNE03	santomea	11	66	20190721	3	F	11	C	U
18TRNE03-05	18TRNE03	santomea	11	66	20190721	4	M	11	D	U
18TRNE03-05	18TRNE03	santomea	11	66	20190721	5	M	11	E	U
